# Supplementary material for: The Food Additive Xanthan Gum Drives Adaptation of the Human Gut Microbiota
Source: Research Square preprint supplement (doi:10.21203/rs.3.rs-607163/v1), 2021-06-30
Supplement: Supplementary file 6 [file bfe8b2965f99265c52783740.xlsx]

## Sheet: Sheet1
Supplementary Table 1. Relative abundance (%) of bacterial operational taxonomic units (OTUs) in human fecal cultures
Sample	1_Bacteria(100);Bacteroidetes(100);Bacteroidia(100);Bacteroidales(100);Bacteroidaceae(100);Bacteroides(100);	2_Bacteria(100);Firmicutes(100);Clostridia(100);Clostridiales(100);Ruminococcaceae(100);Ruminococcaceae_UCG-013(100);	3_Bacteria(100);Bacteroidetes(100);Bacteroidia(100);Bacteroidales(100);Bacteroidaceae(100);Bacteroides(100);	4_Bacteria(100);Firmicutes(100);Bacilli(100);Lactobacillales(100);Enterococcaceae(100);Enterococcus(99);	5_Bacteria(100);Bacteroidetes(100);Bacteroidia(100);Bacteroidales(100);Tannerellaceae(100);Parabacteroides(100);	6_Bacteria(100);Proteobacteria(100);Gammaproteobacteria(100);Enterobacteriales(100);Enterobacteriaceae(100);Escherichia-Shigella(100);	7_Bacteria(100);Bacteroidetes(100);Bacteroidia(100);Bacteroidales(100);Tannerellaceae(100);Parabacteroides(100);	8_Bacteria(100);Firmicutes(100);Clostridia(100);Clostridiales(100);Lachnospiraceae(100);Lachnospiraceae_unclassified(100);	9_Bacteria(100);Firmicutes(100);Erysipelotrichia(100);Erysipelotrichales(100);Erysipelotrichaceae(100);Erysipelotrichaceae_ge(100);	10_Bacteria(100);Firmicutes(100);Clostridia(100);Clostridiales(100);Lachnospiraceae(100);Anaerostipes(100);	11_Bacteria(100);Firmicutes(100);Clostridia(100);Clostridiales(100);Lachnospiraceae(100);Lachnoclostridium(100);	12_Bacteria(100);Firmicutes(100);Clostridia(100);Clostridiales(100);Lachnospiraceae(100);Eisenbergiella(100);	13_Bacteria(100);Firmicutes(100);Clostridia(100);Clostridiales(100);Ruminococcaceae(100);Flavonifractor(100);	14_Bacteria(100);Bacteroidetes(100);Bacteroidia(100);Bacteroidales(100);Bacteroidaceae(100);Bacteroides(100);	15_Bacteria(100);Bacteroidetes(100);Bacteroidia(100);Bacteroidales(100);Bacteroidaceae(100);Bacteroides(100);	16_Bacteria(100);Firmicutes(100);Negativicutes(100);Selenomonadales(100);Acidaminococcaceae(100);Phascolarctobacterium(100);	17_Bacteria(100);Bacteroidetes(100);Bacteroidia(100);Bacteroidales(100);Tannerellaceae(100);Parabacteroides(100);	18_Bacteria(100);Firmicutes(100);Clostridia(100);Clostridiales(100);Lachnospiraceae(100);Lachnoclostridium(99);	19_Bacteria(100);Fusobacteria(100);Fusobacteriia(100);Fusobacteriales(100);Fusobacteriaceae(100);Fusobacterium(100);	20_Bacteria(100);Firmicutes(100);Clostridia(100);Clostridiales(100);Lachnospiraceae(100);Lachnospiraceae_ND3007_group(100);	21_Bacteria(100);Bacteroidetes(100);Bacteroidia(100);Bacteroidales(100);Bacteroidaceae(100);Bacteroides(100);	22_Bacteria(100);Proteobacteria(100);Gammaproteobacteria(100);Enterobacteriales(100);Enterobacteriaceae(100);Enterobacteriaceae_unclassified(100);	23_Bacteria(100);Firmicutes(100);Erysipelotrichia(100);Erysipelotrichales(100);Erysipelotrichaceae(100);Erysipelatoclostridium(100);	24_Bacteria(100);Bacteroidetes(100);Bacteroidia(100);Bacteroidales(100);Bacteroidaceae(100);Bacteroides(100);	25_Bacteria(100);Bacteroidetes(100);Bacteroidia(100);Bacteroidales(100);Tannerellaceae(100);Parabacteroides(100);	26_Bacteria(100);Bacteroidetes(100);Bacteroidia(100);Bacteroidales(100);Bacteroidaceae(100);Bacteroides(100);	27_Bacteria(100);Firmicutes(100);Clostridia(100);Clostridiales(100);Lachnospiraceae(100);Lachnoclostridium(98);	28_Bacteria(100);Firmicutes(100);Clostridia(100);Clostridiales(100);Lachnospiraceae(100);Blautia(100);	29_Bacteria(100);Firmicutes(100);Clostridia(100);Clostridiales(100);Ruminococcaceae(100);Ruminiclostridium_5(100);	30_Bacteria(100);Bacteroidetes(100);Bacteroidia(100);Bacteroidales(100);Tannerellaceae(100);Parabacteroides(100);	31_Bacteria(100);Firmicutes(100);Clostridia(100);Clostridiales(100);Lachnospiraceae(100);Dorea(100);	32_Bacteria(100);Firmicutes(100);Clostridia(100);Clostridiales(100);Lachnospiraceae(100);Hungatella(99);	33_Bacteria(100);Firmicutes(100);Erysipelotrichia(100);Erysipelotrichales(100);Erysipelotrichaceae(100);Dielma(100);	34_Bacteria(100);Bacteroidetes(100);Bacteroidia(100);Bacteroidales(100);Bacteroidaceae(100);Bacteroides(100);	35_Bacteria(100);Actinobacteria(100);Coriobacteriia(100);Coriobacteriales(100);Eggerthellaceae(100);Eggerthella(100);	36_Bacteria(100);Firmicutes(100);Clostridia(100);Clostridiales(100);Lachnospiraceae(100);Lachnoclostridium(100);	37_Bacteria(100);Bacteroidetes(100);Bacteroidia(100);Bacteroidales(100);Bacteroidaceae(100);Bacteroides(100);	38_Bacteria(100);Firmicutes(100);Negativicutes(100);Selenomonadales(100);Veillonellaceae(100);Dialister(100);	39_Bacteria(100);Firmicutes(100);Clostridia(100);Clostridiales(100);Ruminococcaceae(100);Faecalibacterium(100);	40_Bacteria(100);Firmicutes(100);Clostridia(100);Clostridiales(100);Lachnospiraceae(100);Lachnospiraceae_unclassified(100);	41_Bacteria(100);Firmicutes(100);Clostridia(100);Clostridiales(100);Lachnospiraceae(100);Dorea(100);	42_Bacteria(100);Firmicutes(100);Clostridia(100);Clostridiales(100);Ruminococcaceae(100);Flavonifractor(100);	43_Bacteria(100);Bacteroidetes(100);Bacteroidia(100);Bacteroidales(100);Bacteroidaceae(100);Bacteroides(100);	44_Bacteria(100);Firmicutes(100);Clostridia(100);Clostridiales(100);Ruminococcaceae(100);Intestinimonas(100);	45_Bacteria(100);Firmicutes(100);Clostridia(100);Clostridiales(100);Lachnospiraceae(100);Lachnospiraceae_unclassified(100);	46_Bacteria(100);Firmicutes(100);Clostridia(100);Clostridiales(100);Ruminococcaceae(100);Ruminococcaceae_UCG-003(100);	47_Bacteria(100);Actinobacteria(100);Coriobacteriia(100);Coriobacteriales(100);Coriobacteriaceae(100);Collinsella(100);	48_Bacteria(100);Firmicutes(100);Clostridia(100);Clostridiales(100);Lachnospiraceae(100);Lachnospiraceae_unclassified(100);	49_Bacteria(100);Firmicutes(100);Clostridia(100);Clostridiales(100);Lachnospiraceae(100);Lachnospiraceae_UCG-004(100);
1	4.39852	34.4356	2.58612	15.6545	0	6.3593	0	1.40964	0.105988	0	0.349762	4.93906	1.51563	2.45893	0	0	0	1.51563	0	0	0	14.0117	0.529942	1.8124	0	0	0.0741918	0.847907	2.31055	0	0	0.99629	0	0.0211977	0.0211977	0	0.190779	0.402756	0	0	0	0.0105988	0	0.688924	0	0	0	0	0
3	1.55288	26.1244	1.92217	14.8234	10.8181	21.2338	5.26465	0.142032	0.0899536	0	0.729098	2.91639	0.506581	0.269861	3.40877	1.3351	0	1.86062	0	0	0	0	1.68545	0.0189376	0	0	0.975286	1.05104	0.071016	0	0.776442	0.284064	0	0	0.047344	0	0.0378752	0	0	0	0.0994224	0.0047344	0	0	0	0.511315	0.0047344	0	0
9	0	21.2352	1.02366	15.4061	18.2439	1.31369	0	1.58098	0.022748	0.022748	0.119427	3.6283	1.2227	1.54117	5.16379	0	0	1.52411	0.011374	0	0	16.2932	0.983849	0.591447	0	0	0.631256	0.64263	2.67857	0	0	0.221793	0	0	0.00568699	0.017061	0	1.48999	0	0	0	0	0	0.216106	0.716561	0	0.437898	0.022748	0.0398089
11	32.7026	18.2765	1.10011	15.7389	0.00733407	15.9956	1.46681	0.0586725	0.0513385	0.0660066	1.15145	1.62083	0.696736	0	0.242024	0	0	1.41547	0	0	0	0	0	0.0513385	0	0.19802	2.01687	1.16612	0	0	1.10011	0.777411	0	0.0660066	0	0	0.139347	1.06344	0	0	0.330033	0	0	0	0.63073	0.374037	0	0	0.00733407
14	1.92497	24.5237	1.40444	15.7533	21.6264	13.2882	3.55529	1.59104	0.07857	0	0.834807	4.11511	0.94284	0.31428	0.0982125	1.36515	0	1.8955	0	0	0	1.58122	0	0.422314	0	0.638381	0.039285	0	0.0196425	0	0.86427	0.225889	0	0	0	0	0	0	0.039285	0	0.00982125	0	0	0	0	0	0.333923	0	0
16	0.324273	16.4141	2.97152	13.7551	26.7142	14.7515	4.25682	0.465774	0.00589588	0	0.524733	0.925653	0.524733	0.182772	1.31478	3.77926	0	1.42091	0	0	0	0	3.90307	0.77236	0	0	0.890278	0.524733	1.19686	0	0.825423	0.224043	0	0	0.047167	0	0.0117918	0	0.0235835	0	0.00589588	0	0	0.0294794	0.5719	0.560108	0	0	0.247627
20	1.22867	22.1559	5.35267	13.157	22.5199	15.5631	0	0.540387	0.0568828	0	0.255973	1.92833	0.989761	0	0	3.13993	0	1.29124	0	0	0	0	2.26962	1.0182	0.0227531	0	1.25711	0.32992	4.05575	0	0.403868	0.193402	0	0.00568828	0.0170648	0	0.0796359	0	0.0284414	0	0.0284414	0	0	0	0.335609	0.301479	0.244596	0	0.187713
22	0	11.7586	4.79108	18.5766	0.0106864	13.1942	6.96399	0.327717	0.0391836	0	0.260036	6.08058	0.252912	0.210166	4.09646	2.09454	0	1.23963	17.5293	1.05083	0	0.00356214	0.626937	0.260036	0	0	1.96986	0.719553	0.00712428	0	0	0.64831	0	0	0.0320593	0	0	0	0	3.07769	1.14701	0	0	0.968903	0	0	0.669683	0	0
25	0.296457	27.2885	0.968908	12.9284	0.00723066	17.0354	4.11424	1.35936	0.0361533	0	0.310918	3.10918	0.621837	0.0144613	0.22415	2.75488	0	2.62473	0	0.0289226	0	0	2.95011	0.563991	0	0	0.00723066	0.9906	0.00723066	15.4591	0.87491	0.563991	0	0.021692	0.0578453	0.00723066	0.0289226	0	0	0	0.202458	0	1.8872	0	0.448301	0.600145	0	0	0
30	0.328616	26.8057	5.47918	13.252	0.134129	20.5821	5.82791	1.50225	0.160955	0	1.05291	3.3197	1.46871	0.0938904	6.03581	0	0	3.12521	0	0	0	0	0	1.66991	0	0.181074	0.456039	0	0	0	1.33459	0.918785	0	0	0.100597	0	0.00670646	0.576755	0	0	0	0.0134129	0	1.5559	0	0	0.00670646	0	0
32	26.0377	20.4058	0.776077	14.4535	2.15023	11.9473	2.57743	1.01816	0.0284799	0.0142399	0.825917	1.96511	1.12496	0.1068	0.192239	6.18014	0	2.04343	0	0	0	0	0	0.0355999	0	0	0.334639	1.62335	0	0.00711997	0	1.068	0	0.11392	0.0854397	0	0.11392	0	0	0	0.598078	0	0	0.384478	0	0.149519	0.142399	0	0.505518
37	0	20.9934	5.4997	14.4883	12.5308	15.1941	4.19469	0.22638	0.0399494	0	0.00665823	8.74892	0.832279	0.41281	1.74446	1.73114	0	1.81104	0	0.0133165	0	0	1.54471	0.346228	0	0	2.23717	0.605899	0.159798	0	0.918836	0.772355	0	0	0.00665823	0	0	0	0	0	0	0.00665823	0	0.11319	0.0932153	0.319595	0.739064	0	0.386178
39	0	21.0906	1.72008	0	20.1913	15.031	9.42117	2.49804	0.0214117	0	0.149882	5.35294	0.913568	0.171294	2.57655	2.66933	0	1.73435	0	0	0	0	3.6971	0.057098	0	0.028549	0.364	2.34816	0.121333	0	0	1.12769	0	0	0.463921	0	0	0	0	0	0	0.0428235	0.521019	0.114196	0.00713725	0.12847	0.0214117	0	0.0927842
43	0	25.5168	1.9648	16.9536	6.5152	14.208	6.0032	1.7408	0	0	0.0256	7.4752	0.9664	4.1472	1.8496	0	0	2.3104	0	0.064	0	0	0	0.2688	0.0384	0.0192	0.4992	0	0.4544	0	1.3888	0	0	0.0064	0.032	0	0.0256	0	0.1728	0	0.7808	0	1.5744	0	0	0.4544	0.6208	0	0.3008
44	0	26.3293	1.99397	17.2191	2.76498	13.4704	6.79724	1.25842	0.079759	0	0.00886211	10.7054	0.744417	3.73981	1.82559	0	0	2.04715	0	0.0531726	0	0	0	0.478554	0.443105	0.124069	1.28501	0	1.24069	0	0.691244	0	0	0.0708968	0.0177242	0	0	0	0.0354484	0	0.584899	0	1.6838	0	0	0.389933	0.540588	0	0.620347
45	0	21.6853	9.35995	13.7933	15.5432	12.4486	0.00587199	1.22137	0.011744	0.0645919	0.728127	1.47974	0.910159	1.01585	1.57957	0.00587199	0	0	0	3.75807	0	0	0.011744	0.23488	0	0	0.111568	0	2.81268	0	0.651791	0	0	0	0.017616	0	0	1.26248	4.66236	0	0	0	0	0	0.663535	0.011744	0.00587199	0.00587199	0.540223
49	0	22.4771	0.413309	13.1639	17.2901	14.0938	7.54977	2.04588	0	0	0.371978	4.53951	0.854171	1.11593	0.427085	2.29386	0	1.39836	0	0	0	0	2.91383	0.49597	0	0	0.358201	0.158435	0.0344424	0	0.564855	1.50169	0	0	0	0	0	0	0.0413309	0	0.413309	0	0	0.371978	0	0.551078	0.144658	0	0.165323
53	0	36.8063	5.66621	14.2926	0	20.2473	5.24038	0.418956	0.0961538	0.178571	1.04396	0	2.78846	0.0686813	4.60852	0	0	2.06044	0	0	0	0.0274725	0.947802	0.0137363	0	0	0	1.97802	0	0	0	1.90934	0	0	0.0686813	0	0	0.206044	0	0	0	0	0	0	0	0	0	0	0
58	0	19.119	2.85997	14.5161	0.0135117	0.0045039	6.94501	2.98608	0.0585506	0.045039	2.52218	6.19736	0.864748	0.666577	3.1167	0	0	1.27911	0	9.57078	0	0	0.67108	2.56272	14.426	0.0045039	1.1575	0.207179	0	0	1.07193	0.274738	0	0	0.045039	0	0	0.792686	0	0	0	0.0045039	0	0	0	0	0.0045039	0	0
59	1.22063	21.7465	6.39225	13.8904	0	17.9194	3.87757	1.94567	0.0825991	0.376285	0.445117	1.9732	2.75789	1.10591	2.78084	3.88216	0	0.743392	0	7.53488	0	0	0.885646	0.380874	0.00917768	0	0	2.28524	0.00458884	0	1.48678	1.32159	0	0.00917768	0.027533	0	0.105543	0	0	0	0.399229	0	0	0	0.692915	0	0.00458884	0	0.706681
Original Community Passage 5	32.8932	22.2013	3.06224	0	8.1364	0	3.46906	0.432708	0.0443803	1.31662	4.47502	0	2.92171	7.21181	3.55043	0	2.7146	0	0	0	3.85739	0	0	1.40908	0	1.04294	0.0184918	0	0.00369836	0	0	0	0.0221902	0.092459	0.122046	0.0147934	0.092459	0	0.00739672	0	0	0.284774	0	0	0	0	0	0.0332853	0.0147934
Original Community Passage 6	45.2055	23.0866	2.96392	0	6.20595	0	4.66303	0.674311	0.491447	1.80578	3.9811	0	2.1296	4.08397	0.720027	0	1.44005	0	0	0	0.80765	0	0	0.213341	0	0.655263	0.011429	0	0	0	0	0	0.034287	0.140958	0.152387	0.0190483	0.0723837	0	0.0304774	0	0	0.0152387	0	0	0	0	0	0.0266677	0
Original Community Passage 7	46.9089	24.3182	3.8627	0	4.45149	0	5.49966	1.20993	0.643784	1.63372	3.50361	0	1.45903	2.28074	0.549966	0.00323509	1.12905	0	0	0	0.585552	0	0	0.190871	0.00323509	0.608198	0.0226457	0.00323509	0	0	0	0	0.0776423	0.161755	0.181165	0.106758	0.161755	0	0.00970528	0	0	0.067937	0	0	0	0	0	0.0582317	0
Original Community Passage 8	46.4078	24.5133	4.70873	0	4.05862	0	5.46169	2.76207	1.56468	1.43613	2.02013	0	1.96136	1.38838	0.448101	0.00734592	0.763976	0	0	0	0.462793	0	0.00367296	0.124881	0	0.451774	0.0293837	0	0.00734592	0	0	0	0.0550944	0.176302	0.150591	0.1359	0.150591	0	0.00734592	0	0.00367296	0.150591	0	0	0	0	0	0.293837	0
Original Community Passage 10	51.0494	20.4817	5.28461	0	2.61211	0	5.99049	4.19372	1.374	1.35513	1.49102	0	1.72505	0.834214	0.256681	0.00754945	0.905934	0	0	0	0.377472	0	0	0.0981428	0	0.475615	0.00377472	0	0	0	0	0	0.154764	0.188736	0.211385	0.14344	0.169863	0	0	0	0	0.0868187	0	0	0	0	0	0.215159	0.00377472
Original Community Passage 11	48.2957	19.2894	6.17951	0	3.55314	0	7.02774	5.12394	1.78757	1.24721	1.69018	0	1.95721	0.565486	0.135088	0	0.92677	0	0	0	0.307876	0	0	0.0753982	0	0.452389	0.0188495	0	0	0	0	0	0.169646	0.185354	0.160221	0.248186	0.144513	0	0.00942477	0	0	0.122522	0	0	0	0	0	0.169646	0
Original Community Passage 12	46.0744	20.0683	6.45787	0	5.09178	0	4.82788	5.84469	2.37901	1.33116	1.34668	0	2.21213	0.628711	0.112547	0.0194047	0.87321	0	0	0	0.349284	0	0	0.0737377	0	0.531688	0.0116428	0	0	0	0	0	0.174642	0.318237	0.20957	0.162999	0.267784	0	0.0116428	0	0	0.174642	0	0	0	0	0	0.182404	0
Original Community Passage 13	48.5113	19.1358	5.45873	0	4.08497	0.0151295	5.64936	6.77197	1.86093	1.12261	1.31022	0	1.78831	0.559792	0.139191	0.0030259	1.2739	0	0	0	0.281409	0	0	0.060518	0	0.511377	0.0030259	0	0	0	0	0	0.178528	0.311668	0.248124	0.0816993	0.163399	0	0.0151295	0	0	0.0816993	0	0	0	0	0	0.139191	0
Original Community Passage 14	47.4705	21.6438	5.54994	0	3.89892	0	6.38508	6.18051	1.51384	1.13357	0.936221	0	1.82912	0.43562	0.129964	0.00481348	0.777377	0	0	0	0.233454	0	0	0.0240674	0	0.291215	0.0264741	0	0	0	0	0	0.233454	0.185319	0.22864	0.166065	0.137184	0	0.0192539	0	0	0.127557	0	0	0	0	0.00240674	0.178099	0
Original Community Passage 15	45.1966	20.4668	5.34387	0	4.1312	0	6.07013	7.87056	1.76328	1.43224	1.64167	0	1.61465	0.415484	0.219565	0.0135117	1.2701	0	0	0	0.310769	0	0	0.128361	0	0.533712	0.0168896	0	0	0	0	0	0.253344	0.158762	0.24321	0.189164	0.168896	0	0.043913	0	0.00337792	0.0709364	0	0	0	0.00675584	0.00675584	0.108094	0
Original Community Passage 16	44.268	23.1229	5.57103	0	3.42928	0	5.85887	7.85825	1.56917	1.10183	1.29372	0	1.74249	0.355927	0.219746	0	0.98731	0	0	0	0.306407	0	0	0.145466	0	0.504488	0.00928505	0	0	0	0	0	0.256886	0.207366	0.238316	0.229031	0.142371	0	0	0	0	0.154751	0	0	0	0	0	0.126896	0.00309502
Original Community Passage 17	46.4402	24.6288	5.15605	0	1.82381	0	5.4863	6.45027	1.39538	1.66612	1.17521	0	1.86546	0.312398	0.193389	0	0.803308	0	0	0	0.336199	0	0	0.133885	0	0.339175	0.00892565	0	0	0	0	0	0.258844	0.184463	0.151736	0.285621	0.133885	0	0.0148761	0	0	0.240993	0	0	0	0	0.00297522	0.20529	0
Original Community Passage 18	46.5863	24.4391	5.98948	0	0.754743	0	6.15219	6.23529	1.50949	0.948622	1.07672	0	1.87301	0.370447	0.294281	0	0.875917	0	0	0	0.328902	0	0	0.173106	0	0.422379	0	0	0	0	0	0	0.32544	0.2285	0.166182	0.411993	0.204265	0	0.0242349	0	0	0.190417	0	0	0	0	0	0.176568	0.00346212
Original Community Passage 19	34.9369	31.5296	8.52772	0	0.344168	0	7.70937	4.3021	1.74761	1.61377	1.33461	0	2.84895	0.581262	0.256214	0.0114723	0.978967	0	0	0	0.455067	0	0	0.3174	0	0.390057	0.00382409	0	0	0	0	0	0.424474	0.175908	0.256214	0.244742	0.183556	0	0.042065	0	0	0.225621	0	0	0	0	0	0.0917782	0
Original Community Passage 20	30.5518	25.1184	13.8976	0	2.43757	0.0049848	6.83914	5.84717	1.55526	2.06869	2.06869	0	2.47246	1.68985	0.413738	0.00996959	1.72474	0	0	0	0.962066	0	0	0.149544	0	0.299088	0.0149544	0	0	0	0	0	0.24924	0.383829	0.234285	0.12462	0.304073	0	0.0348936	0	0.0149544	0.139574	0	0	0	0	0	0.0199392	0.0149544
Original Community BHI-Blood Passage	4.96197	0.00437178	29.9467	0	0.192358	0	0.402203	0	8.23205	22.5933	7.10851	0	0.192358	15.1919	0.0437178	0.0349742	0.157384	0	0	0	5.65708	0	0	2.51814	0	0.78692	0.0437178	0	0	0	0	0	0.502754	0.0306024	0.214217	0	0.00874355	0	0.0437178	0	0	0.292909	0	0	0	0	0	0.0131153	0
Samples numbered between 1-59 represent enrichment cultures from different individuals. The Original Community Passages represent an enrichment culture from a single indivudal at different days post enrichment (starting at day 5).
[truncated: 680 more columns]
