# Supplementary material for: The Food Additive Xanthan Gum Drives Adaptation of the Human Gut Microbiota
Source: Research Square preprint supplement (doi:10.21203/rs.3.rs-607163/v1), 2021-06-30
Supplement: Supplementary file 7 [file d05165fd48484e3bd73cfce8.xlsx]

## Sheet: Supplemental Table 2
Supplementary Table 2. Metagenomic analyses of XG-degrading cultures including taxonomy, with genome and XG locus comparisons.

## Sheet: RUCG13 MAGs ILLUMINA
MAG Id	Marker lineage	# genomes	# markers	# marker sets	Completeness	Contamination	Strain heterogeneity	Genome size (bp)	# ambiguous bases	# scaffolds	classification (GTDB-Tk)	closest relative (MiGA)	% AAI (MiGA)
MAG2/ORIGINAL	o__Clostridiales (UID1212)	172	263	149	97.99	1.01	0	2777427	0	32	d__Bacteria;p__Firmicutes_A;c__Clostridia;o__Monoglobales_A;f__UBA1381;g__CAG-41;s__CAG-41 sp900066215	Monoglobus pectinilyticus NZ CP020991	47.24
S01.1	o__Clostridiales (UID1212)	172	263	149	97.99	1.34	0	2739462	0	34	d__Bacteria;p__Firmicutes_A;c__Clostridia;o__Monoglobales;f__UBA1381;g__CAG-41;s__CAG-41 sp900066215	Monoglobus pectinilyticus NZ CP020991	47.28
S03.4	o__Clostridiales (UID1212)	172	263	149	97.99	1.34	0	2934651	0	65	d__Bacteria;p__Firmicutes_A;c__Clostridia;o__Monoglobales;f__UBA1381;g__CAG-41;s__CAG-41 sp900066215	Monoglobus pectinilyticus NZ CP020991	47.28
S09.3	o__Clostridiales (UID1212)	172	263	149	95.3	0.67	0	2827263	0	62	d__Bacteria;p__Firmicutes_A;c__Clostridia;o__Monoglobales;f__UBA1381;g__CAG-41;s__CAG-41 sp900066215	Monoglobus pectinilyticus NZ CP020991	47.07
S11.2	o__Clostridiales (UID1212)	172	263	149	94.63	1.34	0	2711297	0	50	d__Bacteria;p__Firmicutes_A;c__Clostridia;o__Monoglobales;f__UBA1381;g__CAG-41;s__CAG-41 sp900066215	Monoglobus pectinilyticus NZ CP020991	46.88
S16.9	o__Clostridiales (UID1212)	172	263	149	96.64	0.67	0	2588540	0	59	d__Bacteria;p__Firmicutes_A;c__Clostridia;o__Monoglobales;f__UBA1381;g__CAG-41;s__CAG-41 sp900066215	Monoglobus pectinilyticus NZ CP020991	47.15
S19.5	o__Clostridiales (UID1212)	172	263	149	95.3	1.34	0	2624664	0	43	d__Bacteria;p__Firmicutes_A;c__Clostridia;o__Monoglobales;f__UBA1381;g__CAG-41;s__CAG-41 sp900066215	Monoglobus pectinilyticus NZ CP020991	46.93
S22.5	o__Clostridiales (UID1212)	172	263	149	97.32	1.01	0	2643781	0	29	d__Bacteria;p__Firmicutes_A;c__Clostridia;o__Monoglobales;f__UBA1381;g__CAG-41;s__CAG-41 sp900066215	Monoglobus pectinilyticus NZ CP020991	47.42
S25.1	o__Clostridiales (UID1212)	172	263	149	96.64	0.67	0	2796691	0	44	d__Bacteria;p__Firmicutes_A;c__Clostridia;o__Monoglobales;f__UBA1381;g__CAG-41;s__CAG-41 sp900066215	Monoglobus pectinilyticus NZ CP020991	47.14
S39.4	o__Clostridiales (UID1212)	172	263	149	96.64	1.68	0	2649966	0	34	d__Bacteria;p__Firmicutes_A;c__Clostridia;o__Monoglobales;f__UBA1381;g__CAG-41;s__CAG-41 sp900066215	Monoglobus pectinilyticus NZ CP020991	47.17
S43.7	o__Clostridiales (UID1212)	172	263	149	95.97	1.01	0	2675967	0	37	d__Bacteria;p__Firmicutes_A;c__Clostridia;o__Monoglobales;f__UBA1381;g__CAG-41;s__CAG-41 sp900066215	Monoglobus pectinilyticus NZ CP020991	47.16
S44.5	o__Clostridiales (UID1212)	172	263	149	96.64	1.34	0	2739019	0	57	d__Bacteria;p__Firmicutes_A;c__Clostridia;o__Monoglobales;f__UBA1381;g__CAG-41;s__CAG-41 sp900066215	Monoglobus pectinilyticus NZ CP020991	47.17
S45.1	o__Clostridiales (UID1212)	172	263	149	96.64	1.01	0	2779321	0	65	d__Bacteria;p__Firmicutes_A;c__Clostridia;o__Monoglobales;f__UBA1381;g__CAG-41;s__CAG-41 sp900066215	Monoglobus pectinilyticus NZ CP020991	47.14
S49.5	o__Clostridiales (UID1212)	172	263	149	96.64	0.67	0	2509266	0	38	d__Bacteria;p__Firmicutes_A;c__Clostridia;o__Monoglobales;f__UBA1381;g__CAG-41;s__CAG-41 sp900066215	Monoglobus pectinilyticus NZ CP020991	47.14
S53.3	o__Clostridiales (UID1212)	172	263	149	95.97	1.34	0	2760338	0	67	d__Bacteria;p__Firmicutes_A;c__Clostridia;o__Monoglobales;f__UBA1381;g__CAG-41;s__CAG-41 sp900066215	Monoglobus pectinilyticus NZ CP020991	47.01
S58.6	o__Clostridiales (UID1212)	172	263	149	78.19	1.34	0	2440918	0	69	d__Bacteria;p__Firmicutes_A;c__Clostridia;o__Monoglobales;f__UBA1381;g__CAG-41;s__CAG-41 sp900066215	Monoglobus pectinilyticus NZ CP020991	45.77
S59.15	o__Clostridiales (UID1212)	172	263	149	97.99	2.01	25	3033258	0	120	d__Bacteria;p__Firmicutes_A;c__Clostridia;o__Monoglobales;f__UBA1381;g__CAG-41;s__CAG-41 sp900066215	Monoglobus pectinilyticus NZ CP020991	47.16
S30.9	o__Clostridiales (UID1212)	172	263	149	93.7	3.64	75	2606752	0	387	d__Bacteria;p__Firmicutes_A;c__Clostridia;o__Monoglobales;f__UBA1381;g__CAG-41;s__CAG-41 sp900066215	Monoglobus pectinilyticus NZ CP020991	45.98
S32.8	o__Clostridiales (UID1212)	172	263	149	75.73	1.98	50	1925676	0	534	d__Bacteria;p__Firmicutes_A;c__Clostridia;o__Monoglobales;f__UBA1381;g__CAG-41;s__CAG-41 sp900066215	Monoglobus pectinilyticus NZ CP020991	46.55
S37.30	o__Clostridiales (UID1212)	172	263	149	61.91	2.01	33.33	1452109	0	493	d__Bacteria;p__Firmicutes_A;c__Clostridia;o__Monoglobales;f__UBA1381;g__CAG-41;s__CAG-41 sp900066215	Monoglobus pectinilyticus NZ CP020991	47.98
S20.unbinned	root (UID1)	5656	56	24	95.83	784.45	13.02	43714007	0	76867	d__Bacteria;p__Firmicutes_A;c__Clostridia;o__Lachnospirales;f__;g__;s__	Monoglobus pectinilyticus NZ CP020991	43.25
	AVERAGE AA XGUL identity (vs XGUL in the Original sample):
S01.1	98.6284
S03.4	94.968
S09.3	94.7383
S11.2	94.9344
S16.9	94.9312
S19.5	99.5048
S22.5	94.9364
S25.1	94.9304
S39.4	94.9344
S43.7	94.9364
S44.5	94.9364
S45.1	94.9364
S49.5	94.9312
S53.3	94.9728
S58.6	94.9364
S59.15	94.9336
average	95.4431

## Sheet: ANI
QUERY_GENOME	REFERENCE_GENOME	ANI
MAG2/ORIGINAL	S01.1	97.3478
MAG2/ORIGINAL	S03.4	97.6983
MAG2/ORIGINAL	S09.3	97.5347
MAG2/ORIGINAL	S11.2	97.5615
MAG2/ORIGINAL	S16.9	97.6258
MAG2/ORIGINAL	S19.5	97.5358
MAG2/ORIGINAL	S22.5	97.6013
MAG2/ORIGINAL	S25.1	97.2892
MAG2/ORIGINAL	S39.4	97.4796
MAG2/ORIGINAL	S43.7	97.2481
MAG2/ORIGINAL	S44.5	97.3959
MAG2/ORIGINAL	S45.1	97.4805
MAG2/ORIGINAL	S49.5	97.7485
MAG2/ORIGINAL	S57.3	97.5802
MAG2/ORIGINAL	S58.6	97.3792
MAG2/ORIGINAL	S59.15	97.7046
MAG1/ORIGINAL	S09.1	98.564
MAG1/ORIGINAL	S11.1	98.5639
MAG1/ORIGINAL	S16.2	98.5075

## Sheet: ONT circular genomes
MAG Id	Marker lineage	# genomes	# markers	# marker sets	Completeness	Contamination	Strain heterogeneity	Genome size (bp)	# ambiguous bases	# scaffolds	classification (GTDB-Tk)	closest relative (MiGA)	% AAI (MiGA)
ONT_Circ01	Bacteroidales (UID2657)	160	490	268	98.94	0.75	0	6414937	0	1	d__Bacteria;p__Bacteroidota;c__Bacteroidia;o__Bacteroidales;f__Bacteroidaceae;g__Bacteroides;s__Bacteroides intestinalis_A	Bacteroides intestinalis NZ CP041379	94.43
ONT_Circ02	Clostridiales (UID1212)	172	263	149	97.99	1.01	0	3041810	0	1	d__Bacteria;p__Firmicutes_A;c__Clostridia;o__Monoglobales;f__UBA1381;g__CAG-41;s__CAG-41 sp900066215	Monoglobus pectinilyticus NZ CP020991	47.26

## Sheet: ORIGINAL ILLUMINA
MAG Id	Marker lineage	# genomes	# markers	# marker sets	Completeness	Contamination	Strain heterogeneity	Genome size (bp)	# ambiguous bases	# scaffolds	classification (GTDB-Tk)	closest relative (MiGA)	% AAI (MiGA)
MAG1	o__Bacteroidales (UID2657)	160	490	268	98.94	0.75	0	6085154	0	36	d__Bacteria;p__Bacteroidota;c__Bacteroidia;o__Bacteroidales;f__Bacteroidaceae;g__Bacteroides;s__Bacteroides intestinalis_A	Bacteroides intestinalis NZ CP041379	94.07
MAG2	o__Clostridiales (UID1212)	172	263	149	97.99	1.01	0	2777427	0	32	d__Bacteria;p__Firmicutes_A;c__Clostridia;o__Monoglobales_A;f__UBA1381;g__CAG-41;s__CAG-41 sp900066215	Monoglobus pectinilyticus NZ CP020991	47.24
MAG3	k__Bacteria (UID203)	5449	104	58	82.76	0	0	6154364	0	108	d__Bacteria;p__Bacteroidota;c__Bacteroidia;o__Bacteroidales;f__Bacteroidaceae;g__Bacteroides;s__Bacteroides thetaiotaomicron	Bacteroides thetaiotaomicron NZ CP040530	97.95
MAG4	o__Bacteroidales (UID2621)	198	427	260	98.65	0	0	4459357	0	32	d__Bacteria;p__Bacteroidota;c__Bacteroidia;o__Bacteroidales;f__Tannerellaceae;g__Parabacteroides;s__Parabacteroides distasonis	Parabacteroides distasonis NZ CP040468	98.31
MAG5	k__Bacteria (UID2372)	131	177	106	99.06	0	0	4416776	0	83	d__Bacteria;p__Firmicutes;c__Bacilli;o__Erysipelotrichales;f__Erysipelotrichaceae;g__Longicatena;s__Longicatena innocuum	Clostridium innocuum NZ CP048838	99.29
MAG6	root (UID1)	5656	56	24	0	0	0	246652	0	15	NA	NA
MAG7	root (UID1)	5656	56	24	0	0	0	454718	0	13	NA	NA
MAG8	k__Bacteria (UID203)	5449	103	57	92.28	17.54	87.5	6978714	0	73	d__Bacteria;p__Firmicutes_A;c__Clostridia;o__Lachnospirales;f__Lachnospiraceae;g__Enterocloster;s__Enterocloster bolteae	NA
MAG9	o__Clostridiales (UID1212)	172	257	149	97.32	0.13	0	3722670	0	82	d__Bacteria;p__Firmicutes_A;c__Clostridia;o__Oscillospirales;f__Oscillospiraceae;g__Flavonifractor;s__Flavonifractor sp000508885	Flavonifractor plautii NZ CP048436	96.76
MAG10	o__Clostridiales (UID1226)	155	278	158	76.58	1.27	0	4548041	0	50	d__Bacteria;p__Firmicutes_A;c__Clostridia;o__Lachnospirales;f__Lachnospiraceae;g__Enterocloster;s__Enterocloster sp000155435	Enterocloster bolteae NZ CP053229	73.3
MAG11	o__Clostridiales (UID1212)	172	263	149	99.33	4.7	42.86	3255929	0	31	d__Bacteria;p__Firmicutes_A;c__Clostridia;o__Lachnospirales;f__Lachnospiraceae;g__Anaerostipes;s__Anaerostipes caccae	Anaerostipes caccae NZ AP023027	98.38
MAG12	o__Bacteroidales (UID2657)	160	492	269	89.97	2.42	22.22	4054656	0	64	d__Bacteria;p__Bacteroidota;c__Bacteroidia;o__Bacteroidales;f__Bacteroidaceae;g__Bacteroides;s__Bacteroides uniformis	Bacteroides uniformis NZ AP019724	96.07
MAG13	p__Actinobacteria (UID2112)	31	211	124	96.77	0	0	3474481	0	50	d__Bacteria;p__Actinobacteriota;c__Coriobacteriia;o__Coriobacteriales;f__Eggerthellaceae;g__Eggerthella;s__Eggerthella lenta	Eggerthella lenta DSM 2243	98.64
MAG14	k__Bacteria (UID2372)	131	177	106	94.34	2.83	0	3269852	0	38	d__Bacteria;p__Firmicutes;c__Bacilli;o__Erysipelotrichales;f__Erysipelotrichaceae;g__Dielma;s__Dielma fastidiosa	Erysipelothrix piscisicarius NZ CP034234	45.3
MAG15	k__Bacteria (UID203)	5449	104	58	27.07	1.72	100	943359	0	40	d__Bacteria;p__Bacteroidota;c__Bacteroidia;o__Bacteroidales;f__Bacteroidaceae;g__Bacteroides;s__Bacteroides clarus	NA
MAG16	k__Bacteria (UID203)	5449	104	58	98.75	299.5	42.26	23230990	0	915	NA	NA
MAG17	k__Bacteria (UID203)	5449	104	58	1.72	0	0	1141439	0	166	NA	NA
MAG18	k__Bacteria (UID203)	5449	103	58	5.17	0	0	575782	0	109	NA	NA
XG-utilization locus in MAG2	Predicted protein - CAZyme family
Ga0308426_102644	glucokinase
Ga0308426_102645	mannose 6-phosphate isomerase
Ga0308426_102646	GH5
Ga0308426_102647	GH38
Ga0308426_102648	phosphoglucomutase
Ga0308426_102649	GH94
Ga0308426_1026410	GH88
Ga0308426_1026411	hypothetical
Ga0308426_1026412	hypothetical
Ga0308426_1026413	GH5
Ga0308426_1026414	permease
Ga0308426_1026415	permease
Ga0308426_1026416	CBM11
Ga0308426_1026417	solute binding protein
Ga0308426_1026418	response regulator
Ga0308426_1026419	solute binding protein
Ga0308426_1026420	histidine kinase
Ga0308426_1026421	hypothetical
Ga0308426_1026422	PL8
Ga0308426_1026423	carbohydrate esterase
Ga0308426_1026424	carbohydrate esterase
Ga0308426_1026425	hypothetical
Ga0308426_1026426	glucokinase
Ga0308426_1026427	GH38
Ga0308426_1026429	transcriptional regulator
XGOs-utilization locus in MAG1	Predicted protein - CAZyme family
Ga0308426_1002974	GH88
Ga0308426_1002975	GH92
Ga0308426_1002976	HTCS
Ga0308426_1002977	SusC-like
Ga0308426_1002978	SusD-like
Ga0308426_1002979	PL_CE
Ga0308426_1002980	GH5
Ga0308426_1002981	GH3

## Sheet: S01 ILLUMINA
MAG Id	Marker lineage	# genomes	# markers	# marker sets	Completeness	Contamination	Strain heterogeneity	Genome size (bp)	# ambiguous bases	# scaffolds	classification (GTDB-Tk)	closest relative (MiGA)	% AAI (MiGA)
S01.1	o__Clostridiales (UID1212)	172	263	149	97.99	1.34	0	2739462	0	34	d__Bacteria;p__Firmicutes_A;c__Clostridia;o__Monoglobales;f__UBA1381;g__CAG-41;s__CAG-41 sp900066215	Monoglobus pectinilyticus NZ CP020991	47.28
S01.10	root (UID1)	5656	56	24	0	0	0	344346	0	32		Clostridium bolteae NZ CP022464	51.91
S01.11	o__Clostridiales (UID1226)	155	278	158	95.36	5.22	44.44	6492076	0	610	d__Bacteria;p__Firmicutes_A;c__Clostridia;o__Lachnospirales;f__Lachnospiraceae;g__Clostridium_M;s__Clostridium_M lavalense	Lachnoclostridium sp. YL32 NZ CP015399	66.55
S01.12	o__Lactobacillales (UID544)	293	475	267	98.05	0.93	50	2717594	0	282	d__Bacteria;p__Firmicutes;c__Bacilli;o__Lactobacillales;f__Enterococcaceae;g__Enterococcus;s__Enterococcus faecalis	Enterococcus faecalis NZ CP021161	99
S01.13	o__Clostridiales (UID1212)	172	257	149	60.22	2.23	30.77	2176166	0	449	d__Bacteria;p__Firmicutes_A;c__Clostridia;o__Oscillospirales;f__Oscillospiraceae;g__Pseudoflavonifractor;s__	Flavonifractor plautii NZ CP015406	65.37
S01.14	k__Bacteria (UID203)	5449	98	58	29.47	0.86	0	1377759	0	214	d__Bacteria;p__Firmicutes_A;c__Clostridia;o__Oscillospirales;f__Oscillospiraceae;g__Pseudoflavonifractor;s__	Desulfitobacterium dehalogenans ATCC 51507	40.18
S01.15	p__Firmicutes (UID1022)	100	295	158	38.77	2.4	0	2211294	0	886	d__Bacteria;p__Firmicutes_A;c__Clostridia;o__Lachnospirales;f__Lachnospiraceae;g__Hungatella;s__Hungatella effluvii	Clostridium sphenoides JCM 1415 NZ LT630003	64.19
S01.16	k__Bacteria (UID203)	5449	103	57	79.2	60.88	66.67	10010671	0	1488	d__Bacteria;p__Firmicutes_A;c__Clostridia;o__Lachnospirales;f__Lachnospiraceae;g__Clostridium_M;s__Clostridium_M sp000155435	Clostridium bolteae NZ CP022464T	90.93
S01.17	root (UID1)	5656	56	24	0	0	0	404033	0	99		Streptomyces sp. WAC8241 CP042279	35.33
S01.18	k__Bacteria (UID203)	5449	104	58	36.21	0	0	583354	0	187	d__Bacteria;p__Firmicutes_C;c__Negativicutes;o__Veillonellales;f__Dialisteraceae;g__Dialister;s__Dialister invisus	Negativicoccus massiliensis NZ LT700188	47.67
S01.19	k__Bacteria (UID203)	5449	104	58	26.44	0	0	824146	0	205	d__Bacteria;p__Firmicutes_C;c__Negativicutes;o__Veillonellales;f__Dialisteraceae;g__Dialister;s__Dialister invisus	Negativicoccus massiliensis NZ LT700188	47.2
S01.2	f__Lachnospiraceae (UID1255)	90	354	174	98.28	3.74	0	7310138	0	68	d__Bacteria;p__Firmicutes_A;c__Clostridia;o__Lachnospirales;f__Lachnospiraceae;g__Eisenbergiella;s__Eisenbergiella tayi	Blautia producta NZ CP035945	56.27
S01.20	k__Bacteria (UID2372)	131	177	106	78.25	8.49	0	3438831	0	949	d__Bacteria;p__Firmicutes;c__Bacilli;o__Erysipelotrichales;f__Erysipelatoclostridiaceae;g__Erysipelatoclostridium;s__Erysipelatoclostridium ramosum	Clostridium sporogenes NZ CP031837	60.57
S01.21	k__Bacteria (UID203)	5449	98	58	8.97	0	0	435590	0	202	d__Bacteria;p__Firmicutes_A;c__Clostridia;o__Oscillospirales;f__Oscillospiraceae;g__Flavonifractor;s__	Desulfitobacterium hafniense DCB 2 NC 011830	40.24
S01.22	root (UID1)	5656	56	24	0	0	0	231766	0	96		Clostridium diolis CP043998	38.17
S01.3	root (UID1)	5656	56	24	0	0	0	294828	0	12		Citrobacter amalonaticus Y19 NZ CP011132	82.54
S01.4	root (UID1)	5656	56	24	4.17	0	0	270352	0	8		Parabacteroides sp. CT06 NZ CP022754	72.67
S01.5	k__Bacteria (UID203)	5449	104	58	89.45	79.97	96.61	9106018	0	224	d__Bacteria;p__Proteobacteria;c__Gammaproteobacteria;o__Enterobacterales;f__Enterobacteriaceae;g__Escherichia;s__	Escherichia coli NZ CP017631	98.63
S01.6	root (UID1)	5656	56	24	0	0	0	434698	0	23		Escherichia coli NZ CP017631	98.63
S01.7	k__Bacteria (UID203)	5449	104	58	10.97	0	0	802341	0	27	d__Bacteria;p__Bacteroidota;c__Bacteroidia;o__Bacteroidales;f__Bacteroidaceae;g__Bacteroides;s__Bacteroides cellulosilyticus	Bacteroides cellulosilyticus NZ CP012801	95.7
S01.8	o__Clostridiales (UID1226)	155	278	158	94.3	0	0	4714625	0	248	d__Bacteria;p__Firmicutes_A;c__Clostridia;o__Lachnospirales;f__Lachnospiraceae;g__Clostridium_Q;s__Clostridium_Q symbiosum	Clostridium bolteae NZ CP022464	61.46
S01.9	k__Bacteria (UID203)	5449	104	58	91.93	166.77	35.96	18340113	0	708	d__Bacteria;p__Bacteroidota;c__Bacteroidia;o__Bacteroidales;f__Bacteroidaceae;g__;s__	Bacteroides dorei CP008741	67.94
S01.1/ XGUL - aa identities to XGUL detected in the ORIGINAL sample
Query id	Subject id	% identity	alignment length	mismatches	gap	q. start	q. end	s. start	s. end	e-value	CAZyme family
Ga0308426_102644	AEKPGEDK_01497	99.68	314	1	0	1	314	1	314	0
Ga0308426_102645	AEKPGEDK_01496	99.68	316	1	0	1	316	1	316	0
Ga0308426_102646	AEKPGEDK_01495	99.58	2143	9	0	1	2143	1	2143	0	GH5
Ga0308426_102647	AEKPGEDK_01494	98.74	950	12	0	1	950	1	950	0	GH38
Ga0308426_102648	AEKPGEDK_01493	93.6	328	21	0	1	328	1	328	0
Ga0308426_102649	AEKPGEDK_01492	93.42	805	53	0	1	805	1	805	0
Ga0308426_1026410	AEKPGEDK_01491	92.37	367	28	0	1	367	1	367	0	GH88
Ga0308426_1026411	AEKPGEDK_01490	99.3	1004	7	0	1	1004	1	1004	0
Ga0308426_1026412	AEKPGEDK_01489	99.73	1886	5	0	1	1886	1	1886	0
Ga0308426_1026413	AEKPGEDK_01488	99.76	849	2	0	1	849	1	849	0
Ga0308426_1026414	AEKPGEDK_01487	99.68	317	1	0	1	317	1	317	0
Ga0308426_1026415	AEKPGEDK_01486	99.68	310	1	0	1	310	1	310	0
Ga0308426_1026416	AEKPGEDK_01485	100	738	0	0	1	738	1	738	0
Ga0308426_1026417	AEKPGEDK_01484	99.8	495	1	0	1	495	1	495	0
Ga0308426_1026418	AEKPGEDK_01483	99.43	524	3	0	1	524	1	524	0
Ga0308426_1026419	AEKPGEDK_01482	99.48	385	2	0	1	385	1	385	0
Ga0308426_1026420	AEKPGEDK_01481	98.3	588	10	0	1	588	1	588	0
Ga0308426_1026421	AEKPGEDK_01480	99.78	450	1	0	1	450	1	450	0
Ga0308426_1026422	AEKPGEDK_01479	99.58	714	3	0	1	714	1	714	0	PL8
Ga0308426_1026423	AEKPGEDK_01478	100	266	0	0	1	266	1	266	0
Ga0308426_1026424	AEKPGEDK_01477	99.69	1604	5	0	1	1604	1	1604	0
Ga0308426_1026425	AEKPGEDK_01476	95.02	261	13	0	1	261	1	261	0
Ga0308426_1026426	AEKPGEDK_01475	100	312	0	0	1	312	1	312	0
Ga0308426_1026427	AEKPGEDK_01474	99.67	900	3	0	1	900	1	900	0
Ga0308426_1026429	AEKPGEDK_01473	99.74	385	1	0	1	385	1	385	0
	AVERAGE AA identity:	98.6284
locus_tag	ftype	length_bp	gene	EC_number	COG	product	length_aa	length Original sample_aa	CAZyme family
AEKPGEDK_01497	CDS	945	glkA_2	2.7.1.2		Glucokinase	314	314
AEKPGEDK_01496	CDS	951	manA	5.3.1.8	COG1482	Mannose-6-phosphate isomerase ManA	316	316
AEKPGEDK_01495	CDS	6432				hypothetical protein	2143	2143	GH5
AEKPGEDK_01494	CDS	2853	mngB_2	3.2.1.170	COG0383	Mannosylglycerate hydrolase	950	950	GH38
AEKPGEDK_01493	CDS	990				hypothetical protein	329	328
AEKPGEDK_01492	CDS	2418	cbpA_1	2.4.1.20	COG3459	Cellobiose phosphorylase	805	805
AEKPGEDK_01491	CDS	1104	ugl	3.2.1.180		Unsaturated chondroitin disaccharide hydrolase	367	367	GH88
AEKPGEDK_01490	CDS	3015				hypothetical protein	1004	1004
AEKPGEDK_01489	CDS	5661				hypothetical protein	1886	1886
AEKPGEDK_01488	CDS	2550				hypothetical protein	849	849
AEKPGEDK_01487	CDS	954	araQ_3		COG0395	L-arabinose transport system permease protein AraQ	317	317
AEKPGEDK_01486	CDS	933	yteP_3		COG4209	putative multiple-sugar transport system permease YteP	310	310
AEKPGEDK_01485	CDS	2217				hypothetical protein	738	738
AEKPGEDK_01484	CDS	1488				hypothetical protein	495	495
AEKPGEDK_01483	CDS	1575	cheB_2	3.1.1.61		Chemotaxis response regulator protein-glutamate methylesterase	524	524
AEKPGEDK_01482	CDS	1158				hypothetical protein	385	385
AEKPGEDK_01481	CDS	1767				hypothetical protein	588	588
AEKPGEDK_01480	CDS	1353				hypothetical protein	450	450
AEKPGEDK_01479	CDS	2145	xly	4.2.2.12		Xanthan lyase	714	714	PL8
AEKPGEDK_01478	CDS	801				hypothetical protein	266	266
AEKPGEDK_01477	CDS	4815				hypothetical protein	1604	1545
AEKPGEDK_01476	CDS	786				Putative bifunctional phosphatase/peptidyl-prolyl cis-trans isomerase	261	261
AEKPGEDK_01475	CDS	939	glkA_1	2.7.1.2		Glucokinase	312	312
AEKPGEDK_01474	CDS	2703	mngB_1	3.2.1.170	COG0383	Mannosylglycerate hydrolase	900	900
AEKPGEDK_01473	CDS	1158	araR		COG1609	Arabinose metabolism transcriptional repressor	385	385

## Sheet: S03 ILLUMINA
MAG Id	Marker lineage	# genomes	# markers	# marker sets	Completeness	Contamination	Strain heterogeneity	Genome size (bp)	# ambiguous bases	# scaffolds	classification (GTDB-Tk)	closest relative (MiGA)	% AAI (MiGA)
S03.1	o__Bacteroidales (UID2621)	198	427	260	98.27	1.54	80	4828551	0	42	d__Bacteria;p__Bacteroidota;c__Bacteroidia;o__Bacteroidales;f__Tannerellaceae;g__Parabacteroides;s__Parabacteroides distasonis	Parabacteroides distasonis NZ AP019729	96.75
S03.10	k__Bacteria (UID203)	5449	104	58	95.75	105.2	36.67	13057750	0	2709	d__Bacteria;p__Bacteroidota;c__Bacteroidia;o__Bacteroidales;f__Bacteroidaceae;g__Bacteroides;s__	Bacteroides caecimuris NZ CP015401	67.92
S03.11	o__Clostridiales (UID1226)	155	278	158	98.6	78.79	49.48	9986514	0	1386	d__Bacteria;p__Firmicutes_A;c__Clostridia;o__Lachnospirales;f__Lachnospiraceae;g__Clostridium_M;s__Clostridium_M citroniae	Clostridium bolteae NZ CP022464	91.56
S03.12	root (UID1)	5656	56	24	0	0	0	1293041	0	359	d__Bacteria;p__Bacteroidota;c__Bacteroidia;o__Bacteroidales;f__Bacteroidaceae;g__Bacteroides;s__	Bacteroides cellulosilyticus NZ CP012801	46.26
S03.13	k__Bacteria (UID203)	5449	103	57	15.79	0.88	0	436355	0	197	d__Bacteria;p__Firmicutes_C;c__Negativicutes;o__Acidaminococcales;f__Acidaminococcaceae;g__Phascolarctobacterium;s__	Phascolarctobacterium faecium NZ AP019004	97.1
S03.14	k__Bacteria (UID203)	5449	103	58	10.34	0	0	349379	0	151	d__Bacteria;p__Firmicutes_C;c__Negativicutes;o__Veillonellales;f__Veillonellaceae;g__Veillonella;s__	Veillonella atypica CP020566	95.52
S03.2	f__Lachnospiraceae (UID1255)	90	354	174	98.85	4.31	0	7434917	0	76	d__Bacteria;p__Firmicutes_A;c__Clostridia;o__Lachnospirales;f__Lachnospiraceae;g__Eisenbergiella;s__Eisenbergiella tayi	Blautia producta NZ CP035945	56.31
S03.3	f__Enterobacteriaceae (UID5103)	157	1005	324	99.65	0.08	0	4518942	0	69	d__Bacteria;p__Proteobacteria;c__Gammaproteobacteria;o__Enterobacterales;f__Enterobacteriaceae;g__Escherichia;s__Escherichia flexneri	Escherichia coli NZ CP025747	99.57
S03.4	o__Clostridiales (UID1212)	172	263	149	97.99	1.34	0	2934651	0	65	d__Bacteria;p__Firmicutes_A;c__Clostridia;o__Monoglobales;f__UBA1381;g__CAG-41;s__CAG-41 sp900066215	Monoglobus pectinilyticus NZ CP020991	47.28
S03.5	k__Bacteria (UID203)	5449	103	57	98.25	81.15	30.88	11113103	0	632	d__Bacteria;p__Firmicutes_A;c__Clostridia;o__Lachnospirales;f__Lachnospiraceae;g__Hungatella;s__Hungatella effluvii	Clostridium saccharolyticum WM1 NC 014376	65.61
S03.6	k__Bacteria (UID203)	5449	104	58	63.57	0	0	3461272	0	162	d__Bacteria;p__Bacteroidota;c__Bacteroidia;o__Bacteroidales;f__Tannerellaceae;g__Parabacteroides;s__Parabacteroides merdae	Parabacteroides sp. CT06 NZ CP022754	72.47
S03.7	k__Bacteria (UID203)	5449	103	57	8.77	0	0	642760	0	38	d__Bacteria;p__Firmicutes_A;c__Clostridia;o__Lachnospirales;f__Lachnospiraceae;g__Hungatella;s__Hungatella effluvii	Desulfitobacterium dehalogenans ATCC 51507 NC 018017	38.27
S03.8	root (UID1)	5656	56	24	0	0	0	805359	0	69	d__Bacteria;p__Firmicutes_A;c__Clostridia;o__Lachnospirales;f__Lachnospiraceae;g__Clostridium_Q;s__	Mycoplasma wenyonii str. Massachusetts NC 018149	35.88
S03.9	root (UID1)	5656	56	24	12.5	4.17	0	2484859	0	779	d__Bacteria;p__Bacteroidota;c__Bacteroidia;o__Bacteroidales;f__Bacteroidaceae;g__Bacteroides;s__	Bacteroides cellulosilyticus NZ CP012801	83.31
S03.4/ XGUL - aa identities to XGUL detected in the ORIGINAL sample
Query id	Subject id	% identity	alignment length	mismatches	gap	q. start	q. end	s. start	s. end	e-value	CAZyme family
Ga0308426_102644	MNKKFPCI_01710	99.68	314	1	0	1	314	1	314	0
Ga0308426_102645	MNKKFPCI_01711	99.68	316	1	0	1	316	1	316	0
Ga0308426_102646	MNKKFPCI_01712	98.97	2143	22	0	1	2143	1	2143	0	GH5
Ga0308426_102647	MNKKFPCI_01713	95.89	950	39	0	1	950	1	950	0	GH38
Ga0308426_102648	MNKKFPCI_01714	93.6	328	21	0	1	328	1	328	0
Ga0308426_102649	MNKKFPCI_01715	93.42	805	53	0	1	805	1	805	0
Ga0308426_1026410	MNKKFPCI_01716	92.37	367	28	0	1	367	1	367	0	GH88
Ga0308426_1026411	MNKKFPCI_01717	99.1	1004	9	0	1	1004	1	1004	0
Ga0308426_1026412	MNKKFPCI_01718	99.68	1886	6	0	1	1886	1	1886	0
Ga0308426_1026413	MNKKFPCI_01719	99.65	849	3	0	1	849	1	849	0
Ga0308426_1026414	MNKKFPCI_01720	99.68	317	1	0	1	317	1	317	0
Ga0308426_1026415	MNKKFPCI_01721	99.68	310	1	0	1	310	1	310	0
Ga0308426_1026416	MNKKFPCI_01722	99.32	738	5	0	1	738	1	738	0
Ga0308426_1026417	MNKKFPCI_01723	99.8	495	1	0	1	495	1	495	0
Ga0308426_1026418	MNKKFPCI_01724	99.43	524	3	0	1	524	1	524	0
Ga0308426_1026419	MNKKFPCI_01725	99.48	385	2	0	1	385	1	385	0
Ga0308426_1026420	MNKKFPCI_01726	98.13	588	11	0	1	588	1	588	0
Ga0308426_1026421	MNKKFPCI_01728	87.11	450	58	0	1	450	1	450	0
Ga0308426_1026422	MNKKFPCI_01729	84.45	714	111	0	1	714	1	714	0	PL8
Ga0308426_1026423	MNKKFPCI_01730	99.62	266	1	0	1	266	1	266	0
Ga0308426_1026424	MNKKFPCI_01731	78.19	1545	304	12	1	1529	1	1528	0
Ga0308426_1026425	MNKKFPCI_01732	93.49	261	17	0	1	261	1	261	0
Ga0308426_1026426	MNKKFPCI_01733	66.67	30	10	0	283	312	10	39	2e-05
Ga0308426_1026427	MNKKFPCI_01734	97.11	900	26	0	1	900	1	900	0
Ga0308426_1026429	MNKKFPCI_01735	100	385	0	0	1	385	1	385	0
	AVERAGE AA identity:	94.968
locus_tag	ftype	length_bp	gene	EC_number	COG	product	length_aa	length Original sample_aa	CAZyme family
MNKKFPCI_01710	CDS	945	glkA_2	2.7.1.2		Glucokinase	314	314
MNKKFPCI_01711	CDS	951	manA	5.3.1.8	COG1482	Mannose-6-phosphate isomerase ManA	316	316
MNKKFPCI_01712	CDS	6432				hypothetical protein	2143	2143	GH5
MNKKFPCI_01713	CDS	2853	mngB_1	3.2.1.170	COG0383	Mannosylglycerate hydrolase	950	950	GH38
MNKKFPCI_01714	CDS	990				hypothetical protein	329	328
MNKKFPCI_01715	CDS	2418	cbpA_1	2.4.1.20	COG3459	Cellobiose phosphorylase	805	805
MNKKFPCI_01716	CDS	1104	ugl	3.2.1.180		Unsaturated chondroitin disaccharide hydrolase	367	367	GH88
MNKKFPCI_01717	CDS	3015				hypothetical protein	1004	1004
MNKKFPCI_01718	CDS	5661				hypothetical protein	1886	1886
MNKKFPCI_01719	CDS	2550				hypothetical protein	849	849
MNKKFPCI_01720	CDS	954	araQ_5		COG0395	L-arabinose transport system permease protein AraQ	317	317
MNKKFPCI_01721	CDS	933	yteP_5		COG4209	putative multiple-sugar transport system permease YteP	310	310
MNKKFPCI_01722	CDS	2217				hypothetical protein	738	738
MNKKFPCI_01723	CDS	1488				hypothetical protein	495	495
MNKKFPCI_01724	CDS	1575	cheB_2	3.1.1.61		Chemotaxis response regulator protein-glutamate methylesterase	524	524
MNKKFPCI_01725	CDS	1158				hypothetical protein	385	385
MNKKFPCI_01726	CDS	1767				hypothetical protein	588	588
MNKKFPCI_01727	CDS	1263				hypothetical protein	420		GH125
MNKKFPCI_01728	CDS	1353				hypothetical protein	450	450
MNKKFPCI_01729	CDS	2145	xly	4.2.2.12		Xanthan lyase	714	714	PL8
MNKKFPCI_01730	CDS	801				hypothetical protein	266	266
MNKKFPCI_01731	CDS	6291				hypothetical protein	2096	1545
MNKKFPCI_01732	CDS	786				Putative bifunctional phosphatase/peptidyl-prolyl cis-trans isomerase	261	261
MNKKFPCI_01733	CDS	120				hypothetical protein	39	312
MNKKFPCI_01734	CDS	2703	mngB_2	3.2.1.170	COG0383	Mannosylglycerate hydrolase	900	900
MNKKFPCI_01735	CDS	1158	araR		COG1609	Arabinose metabolism transcriptional repressor	385	385

## Sheet: S09 ILLUMINA
MAG Id	Marker lineage	# genomes	# markers	# marker sets	Completeness	Contamination	Strain heterogeneity	Genome size (bp)	# ambiguous bases	# scaffolds	classification (GTDB-Tk)	closest relative (MiGA)	% AAI (MiGA)
S09.1	o__Bacteroidales (UID2657)	160	492	269	99.13	0.89	70	6078629	0	61	d__Bacteria;p__Bacteroidota;c__Bacteroidia;o__Bacteroidales;f__Bacteroidaceae;g__Bacteroides;s__Bacteroides intestinalis_A	Bacteroides intestinalis NZ CP041379	94.02
S09.10	o__Bacteroidales (UID2657)	160	492	269	95.96	1.97	55.56	4491743	0	267	d__Bacteria;p__Bacteroidota;c__Bacteroidia;o__Bacteroidales;f__Bacteroidaceae;g__Bacteroides;s__Bacteroides uniformis	Bacteroides uniformis NZ AP019724	95.55
S09.11	k__Bacteria (UID203)	5449	104	58	86.97	80.13	93.65	9022394	0	939	d__Bacteria;p__Proteobacteria;c__Gammaproteobacteria;o__Enterobacterales;f__Enterobacteriaceae;g__Escherichia;s__	Escherichia coli C NZ CP020543	97.71
S09.12	o__Selenomonadales (UID1024)	64	334	167	99.4	0.08	0	2002955	0	62	d__Bacteria;p__Firmicutes_C;c__Negativicutes;o__Veillonellales;f__Veillonellaceae;g__Veillonella;s__Veillonella parvula_A	Veillonella parvula HSIVP1 NZ CM002135	97.16
S09.13	k__Bacteria (UID2372)	131	177	106	100	3.3	0	3527462	0	271	d__Bacteria;p__Firmicutes;c__Bacilli;o__Erysipelotrichales;f__Erysipelatoclostridiaceae;g__Erysipelatoclostridium;s__Erysipelatoclostridium ramosum	Erysipelotrichaceae bacterium SG0102 NZ AP019309	53.42
S09.14	o__Clostridiales (UID1226)	155	278	158	39.18	1.27	100	2685705	0	467	d__Bacteria;p__Firmicutes_A;c__Clostridia;o__Lachnospirales;f__Lachnospiraceae;g__Blautia;s__Blautia sp001304935	Blautia producta NZ CP035945	83.26
S09.15	k__Bacteria (UID203)	5449	103	57	21.05	0.88	100	1174713	0	214	d__Bacteria;p__Firmicutes_A;c__Clostridia;o__Lachnospirales;f__Lachnospiraceae;g__Blautia;s__Blautia sp001304935	Desulfitobacterium dehalogenans ATCC 51507 NC 018017	38.92
S09.16	k__Bacteria (UID203)	5449	103	57	8.77	0	0	3643881	0	1061	d__Bacteria;p__Firmicutes_A;c__Clostridia;o__Lachnospirales;f__Lachnospiraceae;g__Clostridium_Q;s__	Bacteroides ovatus NZ CP012938	48.45
S09.17	root (UID1)	5656	56	24	0	0	0	371085	0	97	d__Bacteria;p__Firmicutes_A;c__Clostridia;o__Lachnospirales;f__Lachnospiraceae;g__Blautia;s__Blautia sp001304935	Blautia sp. YL58 NZ CP015405	83.41
S09.18	root (UID1)	5656	56	24	8.33	0	0	914765	0	280	d__Bacteria;p__Firmicutes_A;c__Clostridia;o__Lachnospirales;f__Lachnospiraceae;g__Clostridium_M;s__Clostridium_M citroniae	Clostridium bolteae NZ CP022464	63.52
S09.19	k__Bacteria (UID203)	5449	103	57	45.93	5.26	0	3471840	0	1233	d__Bacteria;p__Firmicutes_A;c__Clostridia;o__Lachnospirales;f__Lachnospiraceae;g__Hungatella;s__Hungatella effluvii	Clostridium sphenoides JCM 1415 NZ LT630003	63.35
S09.2	o__Bacteroidales (UID2621)	198	427	260	99.26	0.19	0	4121374	0	76	d__Bacteria;p__Bacteroidota;c__Bacteroidia;o__Bacteroidales;f__Tannerellaceae;g__Parabacteroides;s__Parabacteroides merdae	Parabacteroides sp. CT06 NZ CP022754	74.13
S09.20	o__Clostridiales (UID1226)	155	278	158	75.45	67.27	42.79	9487520	0	3132	d__Bacteria;p__Firmicutes_A;c__Clostridia;o__Lachnospirales;f__Lachnospiraceae;g__Clostridium_M;s__	Clostridium bolteae NZ CP022464	90.21
S09.21	k__Bacteria (UID203)	5449	103	57	14.39	0	0	3259352	0	1065	d__Bacteria;p__Firmicutes_A;c__Clostridia;o__Lachnospirales;f__Lachnospiraceae;g__Clostridium_M;s__	Clostridium bolteae NZ CP022464	67.45
S09.22	k__Bacteria (UID203)	5449	103	57	47	0.88	0	1353278	0	423	d__Bacteria;p__Firmicutes_C;c__Negativicutes;o__Acidaminococcales;f__Acidaminococcaceae;g__Phascolarctobacterium;s__Phascolarctobacterium faecium	Megamonas hypermegale ART12 1 FP929048	48.28
S09.23	k__Bacteria (UID203)	5449	103	57	1.75	0	0	634582	0	235		Clostridium bolteae NZ CP022464	65.95
S09.24	root (UID1)	5656	56	24	0	0	0	396089	0	121		Paenibacillus sp. FSL H7 0737 NZ CP009279	36.2
S09.25	k__Bacteria (UID203)	5449	104	58	14.97	0	0	1054740	0	491	d__Bacteria;p__Bacteroidota;c__Bacteroidia;o__Bacteroidales;f__Bacteroidaceae;g__Bacteroides;s__	Bacteroides ovatus NZ CP012938	89.01
S09.26	k__Bacteria (UID203)	5449	103	57	5.26	0	0	214989	0	100	d__Bacteria;p__Firmicutes_A;c__Clostridia;o__Lachnospirales;f__Lachnospiraceae;g__Dorea;s__	Clostridium scindens ATCC 35704 NZ CP036170	97.09
S09.27	root (UID1)	5656	56	24	0	0	0	418987	0	211	d__Bacteria;p__Firmicutes_A;c__Clostridia;o__Oscillospirales;f__Oscillospiraceae;g__Flavonifractor;s__	Peptococcaceae bacterium DCMF NZ CP017634	40.36
S09.3	o__Clostridiales (UID1212)	172	263	149	95.3	0.67	0	2827263	0	62	d__Bacteria;p__Firmicutes_A;c__Clostridia;o__Monoglobales;f__UBA1381;g__CAG-41;s__CAG-41 sp900066215	Monoglobus pectinilyticus NZ CP020991	47.07
S09.4	o__Lactobacillales (UID544)	293	475	267	99.63	0.07	0	2767912	0	27	d__Bacteria;p__Firmicutes;c__Bacilli;o__Lactobacillales;f__Enterococcaceae;g__Enterococcus;s__Enterococcus faecalis	Enterococcus faecalis LR607371	99.13
S09.5	o__Bacteroidales (UID2621)	198	427	260	99.11	0.13	0	4763648	0	68	d__Bacteria;p__Bacteroidota;c__Bacteroidia;o__Bacteroidales;f__Tannerellaceae;g__Parabacteroides;s__Parabacteroides distasonis	Parabacteroides distasonis NZ AP019729	99.33
S09.6	k__Bacteria (UID203)	5449	103	57	98.25	49.12	11.11	8822469	0	297	d__Bacteria;p__Firmicutes_A;c__Clostridia;o__Lachnospirales;f__Lachnospiraceae;g__Clostridium_Q;s__Clostridium_Q symbiosum	Hungatella hathewayi WAL 18680 NZ CP040506	60.97
S09.7	root (UID1)	5656	56	24	0	0	0	385764	0	22	d__Bacteria;p__Firmicutes_A;c__Clostridia;o__Lachnospirales;f__Lachnospiraceae;g__Clostridium_Q;s__	Clostridium bolteae NZ CP022464	45.9
S09.8	f__Lachnospiraceae (UID1255)	90	354	174	40.23	0.57	100	3043896	0	83	d__Bacteria;p__Firmicutes_A;c__Clostridia;o__Lachnospirales;f__Lachnospiraceae;g__Eisenbergiella;s__Eisenbergiella tayi	Clostridium bolteae NZ CP022464	45.9
S09.9	root (UID1)	5656	56	24	0	0	0	245543	0	26		Escherichia coli CP040269	69.86
S09.3/ XGUL - aa identities to XGUL detected in the ORIGINAL sample
Query id	Subject id	% identity	alignment length	mismatches	gap	q. start	q. end	s. start	s. end	e-value	CAZy family
Ga0308426_102644	LPJMPPNB_00365	99.68	314	1	0	1	314	1	314	0
Ga0308426_102645	LPJMPPNB_00364	99.68	316	1	0	1	316	1	316	0
Ga0308426_102646	LPJMPPNB_00363	98.93	2143	23	0	1	2143	1	2143	0	GH5
Ga0308426_102647	LPJMPPNB_00362	95.89	950	39	0	1	950	1	950	0	GH38
Ga0308426_102648	LPJMPPNB_00361	93.6	328	21	0	1	328	1	328	0
Ga0308426_102649	LPJMPPNB_00360	93.42	805	53	0	1	805	1	805	0
Ga0308426_1026410	LPJMPPNB_00359	92.37	367	28	0	1	367	1	367	0	GH88
Ga0308426_1026411	LPJMPPNB_00358	99.1	1004	9	0	1	1004	1	1004	0
Ga0308426_1026412	LPJMPPNB_00357	99.68	1886	6	0	1	1886	1	1886	0
Ga0308426_1026413	LPJMPPNB_00356	99.76	849	2	0	1	849	1	849	0
Ga0308426_1026414	LPJMPPNB_00355	99.68	317	1	0	1	317	1	317	0
Ga0308426_1026415	LPJMPPNB_00354	99.68	310	1	0	1	310	1	310	0
Ga0308426_1026416	LPJMPPNB_00353	99.32	738	5	0	1	738	1	738	0
Ga0308426_1026417	LPJMPPNB_00352	99.8	495	1	0	1	495	1	495	0
Ga0308426_1026418	LPJMPPNB_00351	99.43	524	3	0	1	524	1	524	0
Ga0308426_1026419	LPJMPPNB_00350	99.48	385	2	0	1	385	1	385	0
Ga0308426_1026420	LPJMPPNB_00349	97.96	588	12	0	1	588	1	588	0
Ga0308426_1026421	LPJMPPNB_00347	87.11	450	58	0	1	450	1	450	0
Ga0308426_1026422	LPJMPPNB_00346	84.45	714	111	0	1	714	1	714	0	PL8
Ga0308426_1026423	LPJMPPNB_00345	99.62	266	1	0	1	266	1	266	0
Ga0308426_1026424	LPJMPPNB_00344	78.25	1545	303	12	1	1529	1	1528	0
Ga0308426_1026425	LPJMPPNB_00343	93.49	261	17	0	1	261	1	261	0
Ga0308426_1026426	LPJMPPNB_00342	66.67	30	10	0	283	312	10	39	2e-05
Ga0308426_1026427	LPJMPPNB_00341	96.67	900	30	0	1	900	1	900	0
	AVERAGE AA identity:	94.7383
S09.1/ XGUL - aa identities to XGUL detected in the ORIGINAL sample
Query id	Subject id	% identity	alignment length	mismatches	gap	q. start	q. end	s. start	s. end	e-value	CAZy family
Ga0308426_1002974	OPCGHGFG_01236	100	400	0	0	1	400	1	400	0	GH88
Ga0308426_1002975	OPCGHGFG_01235	99.86	704	1	0	1	704	1	704	0	GH92
Ga0308426_1002976	OPCGHGFG_01234	99.4	1324	8	0	1	1324	1	1324	0
Ga0308426_1002977	OPCGHGFG_01233	99.9	1047	1	0	1	1047	1	1047	0
Ga0308426_1002978	OPCGHGFG_01232	100	532	0	0	1	532	1	532	0
Ga0308426_1002979	OPCGHGFG_01231	99.82	564	1	0	1	564	1	564	0
Ga0308426_1002980	OPCGHGFG_01230	99.42	345	2	0	1	345	1	345	0
Ga0308426_1002981	OPCGHGFG_01229	99.74	783	2	0	1	783	1	783	0	GH3
locus_tag	ftype	length_bp	gene	EC_number	COG	product		length_aa	length Original sample_aa	CAZy family
LPJMPPNB_00365	CDS	945	glkA_1	2.7.1.2		Glucokinase		314	314
LPJMPPNB_00364	CDS	951	manA	5.3.1.8	COG1482	Mannose-6-phosphate isomerase ManA		316	316
LPJMPPNB_00363	CDS	6432				hypothetical protein		2143	2143	GH5
LPJMPPNB_00362	CDS	2853	mngB_2	3.2.1.170	COG0383	Mannosylglycerate hydrolase		950	950	GH38
LPJMPPNB_00361	CDS	990				hypothetical protein		329	328
LPJMPPNB_00360	CDS	2418	cbpA_1	2.4.1.20	COG3459	Cellobiose phosphorylase		805	805
LPJMPPNB_00359	CDS	1104	ugl_1	3.2.1.180		Unsaturated chondroitin disaccharide hydrolase		367	367	GH88
LPJMPPNB_00358	CDS	3015				hypothetical protein		1004	1004
LPJMPPNB_00357	CDS	5661				hypothetical protein		1886	1886
LPJMPPNB_00356	CDS	2550				hypothetical protein		849	849
LPJMPPNB_00355	CDS	954	araQ_2		COG0395	L-arabinose transport system permease protein AraQ		317	317
LPJMPPNB_00354	CDS	933	yteP_2		COG4209	putative multiple-sugar transport system permease YteP		310	310
LPJMPPNB_00353	CDS	2217				hypothetical protein		738	738
LPJMPPNB_00352	CDS	1488				hypothetical protein		495	495
LPJMPPNB_00351	CDS	1575	cheB_2	3.1.1.61		Chemotaxis response regulator protein-glutamate methylesterase		524	524
LPJMPPNB_00350	CDS	1158				hypothetical protein		385	385
LPJMPPNB_00349	CDS	1767				hypothetical protein		588	588
LPJMPPNB_00348	CDS	1263				hypothetical protein		420		GH125
LPJMPPNB_00347	CDS	1353				hypothetical protein		450	450
LPJMPPNB_00346	CDS	2145	xly	4.2.2.12		Xanthan lyase		714	714	PL8
LPJMPPNB_00345	CDS	801				hypothetical protein		266	266
LPJMPPNB_00344	CDS	6291				hypothetical protein		2096	1545
LPJMPPNB_00343	CDS	786				Putative bifunctional phosphatase/peptidyl-prolyl cis-trans isomerase		261	261
LPJMPPNB_00342	CDS	120				hypothetical protein		39	312
LPJMPPNB_00341	CDS	2703	mngB_1	3.2.1.170	COG0383	Mannosylglycerate hydrolase		900	900
GH125 from S03.4
Query id	Subject id	% identity	alignment length	mismatches	gap	q. start	q. end	s. start	s. end	e-value
MNKKFPCI_01727	LPJMPPNB_00348	100	420	0	0	1	420	1	420	0	879	GH125

## Sheet: S11 ILLUMINA
MAG Id	Marker lineage	# genomes	# markers	# marker sets	Completeness	Contamination	Strain heterogeneity	Genome size (bp)	# ambiguous bases	# scaffolds	classification (GTDB-Tk)	closest relative (MiGA)	% AAI (MiGA)
S11.1	o__Bacteroidales (UID2657)	160	492	269	99.13	3.16	30.77	6280312	0	44	d__Bacteria;p__Bacteroidota;c__Bacteroidia;o__Bacteroidales;f__Bacteroidaceae;g__Bacteroides;s__Bacteroides intestinalis_A	Bacteroides intestinalis NZ CP041379	93.34
S11.10	root (UID1)	5656	56	24	0	0	0	227952	0	19		Desulfitobacterium dehalogenans ATCC 51507 NC 018017	35.23
S11.11	o__Bacteroidales (UID2657)	160	492	269	93.85	28.27	14.84	7052684	0	489	d__Bacteria;p__Bacteroidota;c__Bacteroidia;o__Bacteroidales;f__Bacteroidaceae;g__Bacteroides;s__Bacteroides faecis	Bacteroides thetaiotaomicron VPI 5482 NC 004663	68.66
S11.12	root (UID1)	5656	56	24	0	0	0	241170	0	11		Parabacteroides distasonis ATCC 8503 NZ LR215978	90.39
S11.13	o__Clostridiales (UID1212)	172	257	149	93.29	0.69	50	2961190	0	102	d__Bacteria;p__Firmicutes_A;c__Clostridia;o__Oscillospirales;f__Oscillospiraceae;g__Intestinimonas;s__Intestinimonas butyriciproducens	Intestinimonas butyriciproducens NZ CP011524	97.45
S11.14	root (UID1)	5656	56	24	4.17	0	0	364181	0	21		Halomonas sulfidaeris AP019514	35.49
S11.15	k__Bacteria (UID203)	5449	103	57	91.39	86.68	76.92	11042056	0	457	d__Bacteria;p__Firmicutes_A;c__Clostridia;o__Lachnospirales;f__Lachnospiraceae;g__Clostridium_M;s__Clostridium_M citroniae	Clostridium bolteae NZ CP022464	94.69
S11.16	k__Bacteria (UID203)	5449	103	57	3.51	0	0	282427	0	16		Sporomusa termitida NZ CP036259	35.61
S11.17	root (UID1)	5656	56	24	0	0	0	503778	0	107		Bacteroides fragilis NZ CP036546	39.69
S11.18	o__Clostridiales (UID1226)	155	278	158	90.03	2.53	25	4598135	0	611	d__Bacteria;p__Firmicutes_A;c__Clostridia;o__Lachnospirales;f__Lachnospiraceae;g__Clostridium_Q;s__Clostridium_Q symbiosum	Clostridium bolteae NZ CP022464	58.35
S11.19	k__Bacteria (UID203)	5449	103	57	0.64	0	0	312982	0	83		Desulfitobacterium dehalogenans ATCC 51507 NC 018017	36.16
S11.2	o__Clostridiales (UID1212)	172	263	149	94.63	1.34	0	2711297	0	50	d__Bacteria;p__Firmicutes_A;c__Clostridia;o__Monoglobales;f__UBA1381;g__CAG-41;s__CAG-41 sp900066215	Monoglobus pectinilyticus NZ CP020991	46.88
S11.20	k__Bacteria (UID203)	5449	103	57	56.14	2.63	50	3568208	0	1179	d__Bacteria;p__Firmicutes_A;c__Clostridia;o__Lachnospirales;f__Lachnospiraceae;g__Clostridium_M;s__Clostridium_M lavalense	Clostridium bolteae NZ CP022464	64.32
S11.21	root (UID1)	5656	56	24	12.5	0	0	1257883	0	556	d__Bacteria;p__Firmicutes_A;c__Clostridia;o__Lachnospirales;f__Lachnospiraceae;g__Clostridium_M;s__	Clostridium bolteae NZ CP022464	66.87
S11.22	root (UID1)	5656	56	24	0	0	0	270973	0	141	d__Bacteria;p__Firmicutes;c__Bacilli;o__Lactobacillales;f__Enterococcaceae;g__Enterococcus;s__	Enterococcus faecalis NZ CP021161	88.16
S11.3	root (UID1)	5656	56	24	0	0	0	286392	0	13		Mycoplasma haemocanis str. Illinois NC 016638	35.73
S11.4	f__Enterobacteriaceae (UID5103)	157	1005	324	99.96	0.62	0	4840617	0	34	d__Bacteria;p__Proteobacteria;c__Gammaproteobacteria;o__Enterobacterales;f__Enterobacteriaceae;g__Escherichia;s__Escherichia coli	Escherichia coli DSM 30083 JCM 1649 ATCC 11775 NZ CP033092	99.72
S11.5	f__Lachnospiraceae (UID1255)	90	354	174	98.85	4.89	0	7613803	0	110	d__Bacteria;p__Firmicutes_A;c__Clostridia;o__Lachnospirales;f__Lachnospiraceae;g__Eisenbergiella;s__Eisenbergiella tayi	Blautia producta NZ CP035945	56.31
S11.6	root (UID1)	5656	56	24	0	0	0	374277	0	23		Paenibacillus durus ATCC 35681 NZ CP011114	35.21
S11.7	o__Bacteroidales (UID2621)	198	427	260	95.26	0.13	0	4332457	0	93	d__Bacteria;p__Bacteroidota;c__Bacteroidia;o__Bacteroidales;f__Tannerellaceae;g__Parabacteroides;s__Parabacteroides distasonis	Parabacteroides distasonis NZ AP019729	96.57
S11.8	p__Firmicutes (UID1022)	100	295	158	75.32	0	0	1474859	0	38	d__Bacteria;p__Firmicutes_C;c__Negativicutes;o__Veillonellales;f__Dialisteraceae;g__Dialister;s__Dialister invisus	Dialister sp. Marseille P5638 NZ LT996885	61.31
S11.9	root (UID1)	5656	56	24	0	0	0	227226	0	14		Bacteroides thetaiotaomicron VPI 5482 NC 004663	91.56
S11.2/ XGUL - aa identities to XGUL detected in the ORIGINAL sample
Query id	Subject id	% identity	alignment length	mismatches	gap	q. start	q. end	s. start	s. end	e-value	CAZyme family
Ga0308426_102644	AKHDFNBF_00252	99.68	314	1	0	1	314	1	314	0
Ga0308426_102645	AKHDFNBF_00251	99.68	316	1	0	1	316	1	316	0
Ga0308426_102646	AKHDFNBF_00250	98.97	2143	22	0	1	2143	1	2143	0	GH5
Ga0308426_102647	AKHDFNBF_00249	95.89	950	39	0	1	950	1	950	0	GH38
Ga0308426_102648	AKHDFNBF_00248	93.6	328	21	0	1	328	1	328	0
Ga0308426_102649	AKHDFNBF_00247	93.42	805	53	0	1	805	1	805	0
Ga0308426_1026410	AKHDFNBF_00246	92.37	367	28	0	1	367	1	367	0	GH88
Ga0308426_1026411	AKHDFNBF_00245	99.1	1004	9	0	1	1004	1	1004	0
Ga0308426_1026412	AKHDFNBF_00244	99.63	1886	7	0	1	1886	1	1886	0
Ga0308426_1026413	AKHDFNBF_00243	99.76	849	2	0	1	849	1	849	0
Ga0308426_1026414	AKHDFNBF_00242	99.68	317	1	0	1	317	1	317	0
Ga0308426_1026415	AKHDFNBF_00241	99.68	310	1	0	1	310	1	310	0
Ga0308426_1026416	AKHDFNBF_00240	99.32	738	5	0	1	738	1	738	0
Ga0308426_1026417	AKHDFNBF_00239	99.8	495	1	0	1	495	1	495	0
Ga0308426_1026418	AKHDFNBF_00238	99.43	524	3	0	1	524	1	524	0
Ga0308426_1026419	AKHDFNBF_00237	99.48	385	2	0	1	385	1	385	0
Ga0308426_1026420	AKHDFNBF_00236	98.13	588	11	0	1	588	1	588	0
Ga0308426_1026421	AKHDFNBF_00234	87.11	450	58	0	1	450	1	450	0
Ga0308426_1026422	AKHDFNBF_00233	84.45	714	111	0	1	714	1	714	0	PL8
Ga0308426_1026423	AKHDFNBF_00232	99.62	266	1	0	1	266	1	266	0
Ga0308426_1026424	AKHDFNBF_00231	78.25	1545	303	12	1	1529	1	1528	0
Ga0308426_1026425	AKHDFNBF_00230	93.49	261	17	0	1	261	1	261	0
Ga0308426_1026426	AKHDFNBF_00229	66.67	30	10	0	283	312	10	39	2e-05
Ga0308426_1026427	AKHDFNBF_00228	96.67	900	30	0	1	900	1	900	0
Ga0308426_1026429	AKHDFNBF_00227	99.48	385	2	0	1	385	1	385	0
	AVERAGE AA identity:	94.9344
S11.1/ XGUL - aa identities to XGUL detected in the ORIGINAL sample
Query id	Subject id	% identity	alignment length	mismatches	gap	q. start	q. end	s. start	s. end	e-value
Ga0308426_1002974	CPEJECPD_02157	100	400	0	0	1	400	1	400	0	GH88
Ga0308426_1002975	CPEJECPD_02156	99.86	704	1	0	1	704	1	704	0	GH92
Ga0308426_1002976	CPEJECPD_02155	99.32	1324	9	0	1	1324	1	1324	0
Ga0308426_1002977	CPEJECPD_02154	99.9	1047	1	0	1	1047	1	1047	0
Ga0308426_1002978	CPEJECPD_02153	100	532	0	0	1	532	1	532	0
Ga0308426_1002979	CPEJECPD_02152	99.82	564	1	0	1	564	1	564	0
Ga0308426_1002980	CPEJECPD_02151	99.42	345	2	0	1	345	1	345	0
Ga0308426_1002981	CPEJECPD_02150	99.87	783	1	0	1	783	1	783	0	GH3
locus_tag	ftype	length_bp	gene	EC_number	COG	product	length_aa	length Original sample_aa	CAZyme family
AKHDFNBF_00252	CDS	945	glkA_1	2.7.1.2		Glucokinase	314	314
AKHDFNBF_00251	CDS	951	manA	5.3.1.8	COG1482	Mannose-6-phosphate isomerase ManA	316	316
AKHDFNBF_00250	CDS	6432				hypothetical protein	2143	2143	GH5
AKHDFNBF_00249	CDS	2853	mngB_2	3.2.1.170	COG0383	Mannosylglycerate hydrolase	950	950	GH38
AKHDFNBF_00248	CDS	990				hypothetical protein	329	328
AKHDFNBF_00247	CDS	2418	cbpA_1	2.4.1.20	COG3459	Cellobiose phosphorylase	805	805
AKHDFNBF_00246	CDS	1104	ugl	3.2.1.180		Unsaturated chondroitin disaccharide hydrolase	367	367	GH88
AKHDFNBF_00245	CDS	3015				hypothetical protein	1004	1004
AKHDFNBF_00244	CDS	5661				hypothetical protein	1886	1886
AKHDFNBF_00243	CDS	2550				hypothetical protein	849	849
AKHDFNBF_00242	CDS	954	araQ_1		COG0395	L-arabinose transport system permease protein AraQ	317	317
AKHDFNBF_00241	CDS	933	yteP_1		COG4209	putative multiple-sugar transport system permease YteP	310	310
AKHDFNBF_00240	CDS	2217				hypothetical protein	738	738
AKHDFNBF_00239	CDS	1488				hypothetical protein	495	495
AKHDFNBF_00238	CDS	1575	cheB_1	3.1.1.61		Chemotaxis response regulator protein-glutamate methylesterase	524	524
AKHDFNBF_00237	CDS	1158				hypothetical protein	385	385
AKHDFNBF_00236	CDS	1767				hypothetical protein	588	588
AKHDFNBF_00235	CDS	1263				hypothetical protein	420		GH125
AKHDFNBF_00234	CDS	1353				hypothetical protein	450	450
AKHDFNBF_00233	CDS	2145	xly	4.2.2.12		Xanthan lyase	714	714	PL8
AKHDFNBF_00232	CDS	801				hypothetical protein	266	266
AKHDFNBF_00231	CDS	6291				hypothetical protein	2096	1545
AKHDFNBF_00230	CDS	786				Putative bifunctional phosphatase/peptidyl-prolyl cis-trans isomerase	261	261
AKHDFNBF_00229	CDS	120				hypothetical protein	39	312
AKHDFNBF_00228	CDS	2703	mngB_1	3.2.1.170	COG0383	Mannosylglycerate hydrolase	900	900
AKHDFNBF_00227	CDS	1158	araR		COG1609	Arabinose metabolism transcriptional repressor	385	385
GH125 from S03.4
Query id	Subject id	% identity	alignment length	mismatches	gap	q. start	q. end	s. start	s. end	e-value
MNKKFPCI_01727	AKHDFNBF_00235	100	420	0	0	1	420	1	420	0	879

## Sheet: S16 ILLUMINA
MAG Id	Marker lineage	# genomes	# markers	# marker sets	Completeness	Contamination	Strain heterogeneity	Genome size (bp)	# ambiguous bases	# scaffolds	classification (GTDB-Tk)	closest relative (MiGA)	% AAI (MiGA)
S16.1	root (UID1)	5656	56	24	0	0	0	223019	0	7		Bacteroides intestinalis NZ CP041379	77.02
S16.10	root (UID1)	5656	56	24	4.17	4.17	0	808607	0	92		Bacteroides thetaiotaomicron VPI 5482 NC 004663	88.79
S16.11	o__Clostridiales (UID1212)	172	263	149	95.86	1.34	33.33	2036420	0	286	d__Bacteria;p__Firmicutes_A;c__Clostridia;o__Oscillospirales;f__Oscillospiraceae;g__Oscillibacter;s__Oscillibacter sp001916835	Dysosmobacter welbionis NZ CP034413	64.06
S16.12	k__Bacteria (UID203)	5449	104	58	12.07	0	0	954017	0	126	d__Bacteria;p__Firmicutes_A;c__Clostridia;o__Eubacteriales;f__Eubacteriaceae;g__Eubacterium;s__Eubacterium callanderi	Eubacterium callanderi NC 014624	96.35
S16.13	root (UID1)	5656	56	24	0	0	0	469146	0	85		Actinomyces sp. Z16 NZ CP027862	35.85
S16.14	o__Clostridiales (UID1120)	304	249	142	73.69	2.11	0	3212923	0	272	d__Bacteria;p__Firmicutes_A;c__Clostridia;o__Eubacteriales;f__Eubacteriaceae;g__Eubacterium;s__Eubacterium callanderi	Eubacterium callanderi NC 014624	97.28
S16.15	o__Bacteroidales (UID2657)	160	492	269	87.57	48.59	40.34	6674162	0	1292	d__Bacteria;p__Bacteroidota;c__Bacteroidia;o__Bacteroidales;f__Bacteroidaceae;g__Bacteroides;s__Bacteroides thetaiotaomicron	Bacteroides thetaiotaomicron NZ CP012937	94.06
S16.16	root (UID1)	5656	56	24	0	0	0	292662	0	60		Bacteroides thetaiotaomicron VPI 5482 NC 004663	40
S16.17	k__Bacteria (UID203)	5449	103	57	45.61	0	0	1196017	0	222	d__Bacteria;p__Firmicutes_C;c__Negativicutes;o__Acidaminococcales;f__Acidaminococcaceae;g__Phascolarctobacterium;s__Phascolarctobacterium faecium	Thermoanaerobacter brockii subsp. finnii Ako 1 NC 014964	42.17
S16.18	root (UID1)	5656	56	24	4.17	0	0	954083	0	332	d__Bacteria;p__Bacteroidota;c__Bacteroidia;o__Bacteroidales;f__Bacteroidaceae;g__Bacteroides;s__Bacteroides uniformis	Bacteroides uniformis NZ AP019724	96.7
S16.19	k__Bacteria (UID203)	5449	103	57	10.53	1.75	0	2825764	0	724	d__Bacteria;p__Firmicutes_A;c__Clostridia;o__Lachnospirales;f__Lachnospiraceae;g__;s__	Bacteroides fragilis NZ CP037440	54.26
S16.2	o__Bacteroidales (UID2657)	160	492	269	97.65	1.3	0	5839854	0	45	d__Bacteria;p__Bacteroidota;c__Bacteroidia;o__Bacteroidales;f__Bacteroidaceae;g__Bacteroides;s__Bacteroides intestinalis_A	Bacteroides intestinalis NZ CP041379	94.03
S16.20	o__Selenomonadales (UID1024)	64	334	167	37.85	0.8	0	650831	0	167	d__Bacteria;p__Firmicutes_C;c__Negativicutes;o__Acidaminococcales;f__Acidaminococcaceae;g__Phascolarctobacterium;s__Phascolarctobacterium faecium	Crassaminicella sp. SY095 NZ CP042243	43.69
S16.21	k__Bacteria (UID203)	5449	103	57	73.84	5.26	33.33	5100556	0	978	d__Bacteria;p__Firmicutes_A;c__Clostridia;o__Lachnospirales;f__Lachnospiraceae;g__Clostridium_M;s__Clostridium_M citroniae	Clostridium bolteae NZ CP022464	67.89
S16.22	k__Bacteria (UID203)	5449	104	58	7.76	1.72	0	843064	0	249	d__Bacteria;p__Bacteroidota;c__Bacteroidia;o__Bacteroidales;f__Bacteroidaceae;g__Bacteroides;s__	Bacteroides fragilis NZ CP036553	73.17
S16.23	o__Clostridiales (UID1212)	172	257	149	69.6	2.01	0	2172397	0	679	d__Bacteria;p__Firmicutes_A;c__Clostridia;o__Oscillospirales;f__Oscillospiraceae;g__Marseille-P3106;s__	Paenibacillus ihbetae NZ CP016809	42.63
S16.24	k__Bacteria (UID203)	5449	103	57	38.36	4.55	60	4805283	0	1534	d__Bacteria;p__Firmicutes_A;c__Clostridia;o__Lachnospirales;f__Lachnospiraceae;g__Eisenbergiella;s__	Blautia producta NZ CP035945	78.21
S16.25	k__Bacteria (UID203)	5449	103	57	30.14	1.75	0	1991041	0	714	d__Bacteria;p__Firmicutes_A;c__Clostridia;o__Lachnospirales;f__Lachnospiraceae;g__Eisenbergiella;s__Eisenbergiella tayi	Blautia producta NZ CP035945	51.91
S16.26	k__Bacteria (UID203)	5449	104	58	6.9	0	0	591276	0	202	d__Bacteria;p__Bacteroidota;c__Bacteroidia;o__Bacteroidales;f__Bacteroidaceae;g__Bacteroides;s__Bacteroides fragilis_A	Bacteroides fragilis NZ CP036553	95.63
S16.27	k__Bacteria (UID203)	5449	103	57	34.21	0	0	1383515	0	500	d__Bacteria;p__Firmicutes_A;c__Clostridia;o__Lachnospirales;f__Lachnospiraceae;g__Blautia;s__Blautia producta	Blautia producta NZ CP035945	97.05
S16.3	o__Bacteroidales (UID2621)	198	427	260	96.19	0.38	0	4237359	0	54	d__Bacteria;p__Bacteroidota;c__Bacteroidia;o__Bacteroidales;f__Tannerellaceae;g__Parabacteroides;s__Parabacteroides johnsonii	Parabacteroides sp. CT06 NZ CP022754	74.79
S16.4	o__Clostridiales (UID1226)	155	278	158	95.2	1.42	66.67	5962385	0	68	d__Bacteria;p__Firmicutes_A;c__Clostridia;o__Lachnospirales;f__Lachnospiraceae;g__Clostridium_M;s__	Clostridium bolteae NZ CP022464	91.33
S16.5	f__Enterobacteriaceae (UID5103)	157	1005	324	99.65	0.58	83.33	5026075	0	162	d__Bacteria;p__Proteobacteria;c__Gammaproteobacteria;o__Enterobacterales;f__Enterobacteriaceae;g__Escherichia;s__Escherichia coli	Escherichia coli str. clone D i14 NC 017652	98.91
S16.6	o__Clostridiales (UID1226)	155	278	158	96.2	3.69	0	5330511	0	273	d__Bacteria;p__Firmicutes_A;c__Clostridia;o__Lachnospirales;f__Lachnospiraceae;g__Clostridium_Q;s__Clostridium_Q symbiosum	Clostridium cf saccharolyticum K10 FP929037	66.53
S16.7	o__Lactobacillales (UID544)	293	475	267	99.63	0.07	0	2776393	0	31	d__Bacteria;p__Firmicutes;c__Bacilli;o__Lactobacillales;f__Enterococcaceae;g__Enterococcus;s__Enterococcus faecalis	Enterococcus faecalis LR607346	99.13
S16.8	o__Bacteroidales (UID2621)	198	427	260	96.69	3.11	50	4586292	0	67	d__Bacteria;p__Bacteroidota;c__Bacteroidia;o__Bacteroidales;f__Tannerellaceae;g__Parabacteroides;s__Parabacteroides distasonis	Parabacteroides sp. CT06 NZ CP022754	99.65
S16.9	o__Clostridiales (UID1212)	172	263	149	96.64	0.67	0	2588540	0	59	d__Bacteria;p__Firmicutes_A;c__Clostridia;o__Monoglobales;f__UBA1381;g__CAG-41;s__CAG-41 sp900066215	Monoglobus pectinilyticus NZ CP020991	47.15
S16.9/ XGUL - aa identities to XGUL detected in the ORIGINAL sample
Query id	Subject id	% identity	alignment length	mismatches	gap	q. start	q. end	s. start	s. end	e-value	CAZyme family
Ga0308426_102644	GEGPIBME_00090	99.68	314	1	0	1	314	1	314	0
Ga0308426_102645	GEGPIBME_00089	99.68	316	1	0	1	316	1	316	0
Ga0308426_102646	GEGPIBME_00088	98.97	2143	22	0	1	2143	1	2143	0	GH5
Ga0308426_102647	GEGPIBME_00087	95.89	950	39	0	1	950	1	950	0	GH38
Ga0308426_102648	GEGPIBME_00086	93.6	328	21	0	1	328	1	328	0
Ga0308426_102649	GEGPIBME_00085	93.42	805	53	0	1	805	1	805	0
Ga0308426_1026410	GEGPIBME_00084	92.37	367	28	0	1	367	1	367	0	GH88
Ga0308426_1026411	GEGPIBME_02055	99.1	1004	9	0	1	1004	1	1004	0
Ga0308426_1026412	GEGPIBME_02054	99.68	1886	6	0	1	1886	1	1886	0
Ga0308426_1026413	GEGPIBME_02053	99.76	849	2	0	1	849	1	849	0
Ga0308426_1026414	GEGPIBME_02052	99.68	317	1	0	1	317	1	317	0
Ga0308426_1026415	GEGPIBME_02051	99.68	310	1	0	1	310	1	310	0
Ga0308426_1026416	GEGPIBME_02050	99.19	738	6	0	1	738	1	738	0
Ga0308426_1026417	GEGPIBME_02049	99.8	495	1	0	1	495	1	495	0
Ga0308426_1026418	GEGPIBME_02048	99.43	524	3	0	1	524	1	524	0
Ga0308426_1026419	GEGPIBME_02047	99.48	385	2	0	1	385	1	385	0
Ga0308426_1026420	GEGPIBME_02046	98.13	588	11	0	1	588	1	588	0
Ga0308426_1026421	GEGPIBME_02044	87.11	450	58	0	1	450	1	450	0
Ga0308426_1026422	GEGPIBME_02043	84.45	714	111	0	1	714	1	714	0	PL8
Ga0308426_1026423	GEGPIBME_02042	99.62	266	1	0	1	266	1	266	0
Ga0308426_1026424	GEGPIBME_02041	78.25	1545	303	12	1	1529	1	1528	0
Ga0308426_1026425	GEGPIBME_02040	93.49	261	17	0	1	261	1	261	0
Ga0308426_1026426	GEGPIBME_02039	66.67	30	10	0	283	312	10	39	1e-05
Ga0308426_1026427	GEGPIBME_02038	96.67	900	30	0	1	900	1	900	0
Ga0308426_1026429	GEGPIBME_02037	99.48	385	2	0	1	385	1	385	0
	AVERAGE AA identity:	94.9312
S16.2/ XGUL - aa identities to XGUL detected in the ORIGINAL sample
Query id	Subject id	% identity	alignment length	mismatches	gap	q. start	q. end	s. start	s. end	e-value	CAZyme family
Ga0308426_1002974	DIHGHFGK_01310	100	400	0	0	1	400	1	400	0	GH88
Ga0308426_1002975	DIHGHFGK_01309	99.86	704	1	0	1	704	1	704	0	GH92
Ga0308426_1002976	DIHGHFGK_01308	99.4	1324	8	0	1	1324	1	1324	0
Ga0308426_1002977	DIHGHFGK_01307	99.9	1047	1	0	1	1047	1	1047	0
Ga0308426_1002978	DIHGHFGK_01306	100	532	0	0	1	532	1	532	0
Ga0308426_1002979	DIHGHFGK_01305	99.82	564	1	0	1	564	1	564	0
Ga0308426_1002980	DIHGHFGK_01304	99.42	345	2	0	1	345	1	345	0
Ga0308426_1002981	DIHGHFGK_01303	99.74	783	2	0	1	783	1	783	0	GH3
locus_tag	ftype	length_bp	gene	EC_number	COG	product	length_aa	length Original sample_aa	CAZyme family
GEGPIBME_00090	CDS	945	glkA_1	2.7.1.2		Glucokinase	314	314
GEGPIBME_00089	CDS	951	manA	5.3.1.8	COG1482	Mannose-6-phosphate isomerase ManA	316	316
GEGPIBME_00088	CDS	6432				hypothetical protein	2143	2143	GH5
GEGPIBME_00087	CDS	2853	mngB_1	3.2.1.170	COG0383	Mannosylglycerate hydrolase	950	950	GH38
GEGPIBME_00086	CDS	990				hypothetical protein	329	328
GEGPIBME_00085	CDS	2418	cbpA_1	2.4.1.20	COG3459	Cellobiose phosphorylase	805	805
GEGPIBME_00084	CDS	1104	ugl	3.2.1.180		Unsaturated chondroitin disaccharide hydrolase	367	367	GH88
GEGPIBME_02055	CDS	3015				hypothetical protein	1004	1004
GEGPIBME_02054	CDS	5661				hypothetical protein	1886	1886
GEGPIBME_02053	CDS	2550				hypothetical protein	849	849
GEGPIBME_02052	CDS	954	araQ_4		COG0395	L-arabinose transport system permease protein AraQ	317	317
GEGPIBME_02051	CDS	933	yteP_4		COG4209	putative multiple-sugar transport system permease YteP	310	310
GEGPIBME_02050	CDS	2217				hypothetical protein	738	738
GEGPIBME_02049	CDS	1488				hypothetical protein	495	495
GEGPIBME_02048	CDS	1575	cheB_3	3.1.1.61		Chemotaxis response regulator protein-glutamate methylesterase	524	524
GEGPIBME_02047	CDS	1158				hypothetical protein	385	385
GEGPIBME_02046	CDS	1767				hypothetical protein	588	588
GEGPIBME_02045	CDS	1263				hypothetical protein	420		GH125
GEGPIBME_02044	CDS	1353				hypothetical protein	450	450
GEGPIBME_02043	CDS	2145	xly	4.2.2.12		Xanthan lyase	714	714	PL8
GEGPIBME_02042	CDS	801				hypothetical protein	266	266
GEGPIBME_02041	CDS	6291				hypothetical protein	2096	1545
GEGPIBME_02040	CDS	786				Putative bifunctional phosphatase/peptidyl-prolyl cis-trans isomerase	261	261
GEGPIBME_02039	CDS	120				hypothetical protein	39	312
GEGPIBME_02038	CDS	2703	mngB_2	3.2.1.170	COG0383	Mannosylglycerate hydrolase	900	900
GEGPIBME_02037	CDS	1158	araR		COG1609	Arabinose metabolism transcriptional repressor	385	385
GH125 from S03.4
Query id	Subject id	% identity	alignment length	mismatches	gap	q. start	q. end	s. start	s. end	e-value
MNKKFPCI_01727	GEGPIBME_02045	100	420	0	0	1	420	1	420	0

[truncated: 15 more sheets: S19 ILLUMINA, S22 ILLUMINA, S25 ILLUMINA, S39 ILLUMINA, S43 ILLUMINA, S44 ILLUMINA, S45 ILLUMINA, S49 ILLUMINA, S53 ILLUMINA, S58 ILLUMINA, S59 ILLUMINA, S20 ILLUMINA, S30 ILLUMINA, S32 ILLUMINA, S37 ILLUMINA]
