# Supplementary material for: The Food Additive Xanthan Gum Drives Adaptation of the Human Gut Microbiota
Source: Research Square preprint supplement (doi:10.21203/rs.3.rs-607163/v1), 2021-06-30
Supplement: Supplementary file 10 [file 94eced7a0354820c4130792e.xlsx]

## Sheet: Sheet1
Supplementary Table 6. Plasmids used for recombinant protein expression and assembly method and primers used.
Original Species	Enzyme Annotation	Plasmid Name	Assembly Method	Fw Primer (if used)	Rv Primer (if used)	Protein Sequence
R. UCG13	RuGH5b (GH5 only)	XGD26-6	PCR of gDNA	GAAGGAGATATACATATGTCGGAGCTTCATGTTGAAGGC	GTGATGGTGGTGATGATGTGCACCCGTGTGAAAAGACC	SELHVEGRYIYNAEGEKVRLTGANIPDLQWATGGDNDLMKRVGLLCDSWNANCVRLCVHSKFWFGQEWYQGKSYGDYRKMVDNVINQITSRGKYVILNLHEFYAITEQQKDFWNDAVEVYGNNPGVIFGLLNEPHDIDWEMWRNGGMLETTDSYGKKTQRVYGHQEILDMIRNKGAKNIVIAGGLDWSYYFDGLCDGYNGMEHGYKLEDKTGNGVIYDTHIYPMKPEYNPVEKAVECLVDEAPILVGEYGHWGERLFDWYDNYLCEYPHVWMNEIHDFIDRNELNYTAWSFHTGAHHHHHH
R. UCG13	RuGH5b (GH5 + CBM A)	XGD26-7	PCR of gDNA	GAAGGAGATATACATATGTCGGAGCTTCATGTTGAAGGC	GTGATGGTGGTGATGATGTTGGGTAACGCTCGATACCGT	SELHVEGRYIYNAEGEKVRLTGANIPDLQWATGGDNDLMKRVGLLCDSWNANCVRLCVHSKFWFGQEWYQGKSYGDYRKMVDNVINQITSRGKYVILNLHEFYAITEQQKDFWNDAVEVYGNNPGVIFGLLNEPHDIDWEMWRNGGMLETTDSYGKKTQRVYGHQEILDMIRNKGAKNIVIAGGLDWSYYFDGLCDGYNGMEHGYKLEDKTGNGVIYDTHIYPMKPEYNPVEKAVECLVDEAPILVGEYGHWGERLFDWYDNYLCEYPHVWMNEIHDFIDRNELNYTAWSFHTGANPNMFMDYDTFTPSNYSGIYMKYKMLQEPETRPEEKDRQYVDPSPLSTWEHIIDFDDNTVDFKVYGKEVRTERTDSGYEGRGQLIDFDRSCVDSWDSAAIADFD…
R. UCG13	RuGH5b (GH5 + CBM A/B)	XGD26-10	PCR of gDNA	GAAGGAGATATACATATGTCGGAGCTTCATGTTGAAGGC	GTGATGGTGGTGATGATGGCTTACTGATTGTCCTGTGAGTTTATCACC	SELHVEGRYIYNAEGEKVRLTGANIPDLQWATGGDNDLMKRVGLLCDSWNANCVRLCVHSKFWFGQEWYQGKSYGDYRKMVDNVINQITSRGKYVILNLHEFYAITEQQKDFWNDAVEVYGNNPGVIFGLLNEPHDIDWEMWRNGGMLETTDSYGKKTQRVYGHQEILDMIRNKGAKNIVIAGGLDWSYYFDGLCDGYNGMEHGYKLEDKTGNGVIYDTHIYPMKPEYNPVEKAVECLVDEAPILVGEYGHWGERLFDWYDNYLCEYPHVWMNEIHDFIDRNELNYTAWSFHTGANPNMFMDYDTFTPSNYSGIYMKYKMLQEPETRPEEKDRQYVDPSPLSTWEHIIDFDDNTVDFKVYGKEVRTERTDSGYEGRGQLIDFDRSCVDSWDSAAIADFD…
R. UCG13	RuGH5b (full)	GH5-13	PCR of gDNA	GAAGGAGATATACATATGGGTTCTGGAACGGTACAAAAGATATTACCCTC	GTGATGGTGGTGATGATGTTTTACTATCAGTTTATAGGTCTGCGG	GSGTVQKILPSELHVEGRYIYNAEGEKVRLTGANIPDLQWATGGDNDLMKRVGLLCDSWNANCVRLCVHSKFWFGQEWYQGKSYGDYRKMVDNVINQITSRGKYVILNLHEFYAITEQQKDFWNDAVEVYGNNPGVIFGLLNEPHDIDWEMWRNGGMLETTDSYGKKTQRVYGHQEILDMIRNKGAKNIVIAGGLDWSYYFDGLCDGYNGMEHGYKLEDKTGNGVIYDTHIYPMKPEYNPVEKAVECLVDEAPILVGEYGHWGERLFDWYDNYLCEYPHVWMNEIHDFIDRNELNYTAWSFHTGANPNMFMDYDTFTPSNYSGIYMKYKMLQEPETRPEEKDRQYVDPSPLSTWEHIIDFDDNTVDFKVYGKEVRTERTDSGYEGRGQLIDFDRSCVDS…
R. UCG13	RuGH5a (GH5 only)	XGD26-12	PCR of gDNA	GAAGGAGATATACATATGGAGGAAGCTGCAGCAGACG	GTGATGGTGGTGATGATGGTCAAGCTTTTCCGGTGCAGT	EEAAADAQNAEINYNRSVPLEVKGNKIVKQGTDEMVVLRGVNVPSMDWGMAEHLFESMTMVYDSWGANLIRLPINPKYWKNGSVWDEKNLTKEQYQKYIDDMVKAAQARGKYIILDCHRYVMPQQDDLDMWKELAVKYGNNSAVLFGLLNEPHDIKPVGVEKPTTVEQWDVWYNGGQIIVGGEEVTAIGHQQLLNEIRKQGANNICIAGGLNWAFDISGFADGYNERPNGYRLIDTAEGHGVMYDSHAYPVKGAKTAWDTIIGPVRRVAPVIIGEWGWDSSDKNISGGDCTSDIWMNQIMNWMDDTDNQYDGIPVNWTAWNLHMSSSPKMLYSWDYKTTAYNGTHIKNRLLSYNTAPEKLDHHHHHH
R. UCG13	RuGH5a (GH5 + CBM A)	XGD26-13	PCR of gDNA	GAAGGAGATATACATATGGAGGAAGCTGCAGCAGACG	GTGATGGTGGTGATGATGGCTTTCCTCTCCCATATCCTTATG	EEAAADAQNAEINYNRSVPLEVKGNKIVKQGTDEMVVLRGVNVPSMDWGMAEHLFESMTMVYDSWGANLIRLPINPKYWKNGSVWDEKNLTKEQYQKYIDDMVKAAQARGKYIILDCHRYVMPQQDDLDMWKELAVKYGNNSAVLFGLLNEPHDIKPVGVEKPTTVEQWDVWYNGGQIIVGGEEVTAIGHQQLLNEIRKQGANNICIAGGLNWAFDISGFADGYNERPNGYRLIDTAEGHGVMYDSHAYPVKGAKTAWDTIIGPVRRVAPVIIGEWGWDSSDKNISGGDCTSDIWMNQIMNWMDDTDNQYDGIPVNWTAWNLHMSSSPKMLYSWDYKTTAYNGTHIKNRLLSYNTAPEKLDGVYSTDFSTDDVFRSYTAPSGKASIKYSDESGNVAITP…
R. UCG13	RuGH5a (GH5 + CBM A/B)	XGD26-14	PCR of gDNA	GAAGGAGATATACATATGGAGGAAGCTGCAGCAGACG	GTGATGGTGGTGATGATGAACAAATGTCTTTTCCGGATACGG	EEAAADAQNAEINYNRSVPLEVKGNKIVKQGTDEMVVLRGVNVPSMDWGMAEHLFESMTMVYDSWGANLIRLPINPKYWKNGSVWDEKNLTKEQYQKYIDDMVKAAQARGKYIILDCHRYVMPQQDDLDMWKELAVKYGNNSAVLFGLLNEPHDIKPVGVEKPTTVEQWDVWYNGGQIIVGGEEVTAIGHQQLLNEIRKQGANNICIAGGLNWAFDISGFADGYNERPNGYRLIDTAEGHGVMYDSHAYPVKGAKTAWDTIIGPVRRVAPVIIGEWGWDSSDKNISGGDCTSDIWMNQIMNWMDDTDNQYDGIPVNWTAWNLHMSSSPKMLYSWDYKTTAYNGTHIKNRLLSYNTAPEKLDGVYSTDFSTDDVFRSYTAPSGKASIKYSDESGNVAITP…
R. UCG13	RuGH5a (GH5 + CBM A/B/C)	XGD26-15	PCR of gDNA	GAAGGAGATATACATATGGAGGAAGCTGCAGCAGACG	GTGATGGTGGTGATGATGTGGTAAGCCCCATTCTATATCACC	EEAAADAQNAEINYNRSVPLEVKGNKIVKQGTDEMVVLRGVNVPSMDWGMAEHLFESMTMVYDSWGANLIRLPINPKYWKNGSVWDEKNLTKEQYQKYIDDMVKAAQARGKYIILDCHRYVMPQQDDLDMWKELAVKYGNNSAVLFGLLNEPHDIKPVGVEKPTTVEQWDVWYNGGQIIVGGEEVTAIGHQQLLNEIRKQGANNICIAGGLNWAFDISGFADGYNERPNGYRLIDTAEGHGVMYDSHAYPVKGAKTAWDTIIGPVRRVAPVIIGEWGWDSSDKNISGGDCTSDIWMNQIMNWMDDTDNQYDGIPVNWTAWNLHMSSSPKMLYSWDYKTTAYNGTHIKNRLLSYNTAPEKLDGVYSTDFSTDDVFRSYTAPSGKASIKYSDESGNVAITP…
R. UCG13	RuGH5a (full)	GH5-30 (13-11 B)	PCR of gDNA	GAAGGAGATATACATATGGGTTCTGAGGAAGCTGCAGCAGACGCTC	GTGATGGTGGTGATGATGTTTATCCATCTTCGGCGAATTACAACGTGG	GSEEAAADAQNAEINYNRSVPLEVKGNKIVKQGTDEMVVLRGVNVPSMDWGMAEHLFESMTMVYDSWGANLIRLPINPKYWKNGSVWDEKNLTKEQYQKYIDDMVKAAQARGKYIILDCHRYVMPQQDDLDMWKELAVKYGNNSAVLFGLLNEPHDIKPVGVEKPTTVEQWDVWYNGGQIIVGGEEVTAIGHQQLLNEIRKQGANNICIAGGLNWAFDISGFADGYNERPNGYRLIDTAEGHGVMYDSHAYPVKGAKTAWDTIIGPVRRVAPVIIGEWGWDSSDKNISGGDCTSDIWMNQIMNWMDDTDNQYDGIPVNWTAWNLHMSSSPKMLYSWDYKTTAYNGTHIKNRLLSYNTAPEKLDGVYSTDFSTDDVFRSYTAPSGKASIKYSDESGNVAI…
R. UCG13	PL8	PL8 (13-1A)	PCR of gDNA	GAAGGAGATATACATATGGGTTCTTCTGGAGGAATGATTATGACGGAT	GTGATGGTGGTGATGATGTACATTTTTTACACCTCCAAATTTTAT	GSSGGMIMTDFNILRKRYSDVLCGRGYNGKKTADCILQSDERTEQRLVQLGGRIEKAITSNEPGVINATLKGILDISISFSQNNSQFYHNKNIKNEIFNALNTLEKVYNDTTVPKGNWWYWEIGIPLSINSIFTLMYDYTDKSQLKRYMAAEKHFNDRIKLTGANRLWESVIFAVRGILLSDNDSIKNAISGIQDVMVITDSGDGFYKDGSFIQHDNIPYNCGYGRSLIQELAPMLYIFKDTEFENKNTDIINTWIEKSYLPFIYNGRTMDMVRGREISRYYEQSDLACTHILSAMLILSEMPEFNELKGTIKTQITDNFFEYASVFTAELAEHLQEDNNIKPKEIKPYFMAFNSMDRVVKHGNGYTIGLAMHSERTAAYESINDENQNAHHTSDGMMY…
R. UCG13	CE-A	CE 13-8 D (XGD5 CE)	PCR of gDNA	GAAGGAGATATACATATGGACGGAGTATCAGCGTATACA	GTGATGGTGGTGATGATGATTCAATGTAAATACTTTATTAAATAATGG	DGVSAYTLPSSDKSNSKILKNTVSSKESVTYYIQANNTPRATMFKLAQVNTGDKINVDINFTYLDTATMELEYCLFVSDSEITLTSHSQDLVKEELEKHTDESNIKNWSTNKSNMKYSLPNGITASKDGFVYLYIGCGDLSEDKTQVTKKIQWSIDSFDVNIDSDGGGETEPDTTPTPTTTINPDVTPTPTPTASPTPTPTLEPELTLDAVYSSNMVLQRKEPITITGTGKSGNTVSVNFNGADEQTTIEHGLWEITLPAMEAVKSATMTVSSGDNMITLDNVAVGDVIFCTGQSNMFNRLETFPTLMNEELSEAYEDVRYMNSFDEISEWKVATMENSKQFSALGFLIGKRMIKKDSDVPIGLISSSLGGSSIMQWIPTYSVNWDSQAKRMMAGASSK…
R. UCG13	CE-B	XGD82-6	PCR of gDNA	GAAGGAGATATACATATGGGTTCTATGTTTAATAAGAAATTTAACTTGTTG	GTGATGGTGGTGATGATGAAACAACTGATTTAGCCAATC	GSMFNKKFNLLKEATEYGFMPYMETYILDGKKRPIVVIFPGGGYGMVSEREAERIAMAYNAAGFHAAVVYYCVEPHTHPLPIQNAANAVAMLRENAEKWNIDTDKVIVCGFSAGGHLAASLSALWNDSEIFSEREIELAMHKPNAQILSYPVITSGEFAHKDSFKNLTGTDDESNHLWSSLSLERRITDIIPPTFLWHTYEDICVPVENTLMYAAGLRRVGVPFELHIFEKGEHGLSRVSDELIWSKRKFEREYPWLSLSVDWLNQLFHHHHHH
R. UCG13	GH 88	XGD82-5	PCR of gDNA	GAAGGAGATATACATATGGGTTCTGTGAATATTGATAAAGCGATTACA	GTGATGGTGGTGATGATGCCAATAAATTTTCCAATCGCT	GSVNIDKAITYAESIVRKSLNYFYDCFPTEQSENLVFKKFENVSWTTGFYEGILWLMYELTGDKAFYNSAKHHSEMFHKRLVDRVELEHHDMGFLFTLSSVADYRITGDEQAKQDGIEAAEWLLKRYQPKGKFIQAWDAMDDSQSYRFIVDCMLNIPLLFWASEVTGYKKYYDAAYNHMQTSIANIIRPDASSYHTFFFDPVTNKPLRGETHQGFSDDSSWARGQSWAVYGLALCYHYTKEKSILPLFERVTHYFIDHLPEDSVPYWDLIFSDGSDEPRDTSAAVVAVCGILEMEKYYHNQEFLDAAEKMMTSLSEKYTTVDYPQSNGIIKDGMYSRKHGHEPECTSWGDYFYLEALMRMKKSDWKIYWHHHHHH
R. UCG13	GH38-A	XGD5_GH38_8	PCR of gDNA	GAAGGAGATATACATATGGGTTCTTCTTATAACAAATATATCAAACCCAAATTTATT	GTGATGGTGGTGATGATGTTTTGCAATTCCTACGGTCAT	GSSYNKYIKPKFIIWYKKEFQMSKNVHIISHSHWDREWYLPFEQHRMRLVELIDKCMEVFEKDDSFKSFFLDGQTIVLDDYLEIRPENKEKLIKYTKEGKFIIGPWYILQDEFYTSGEANIRNLLVGMKEAEKYGAMCKMGYFPDAFGNAGQMPQLLKQAGMDTVTFGRGVRPVGFDNEVQENGNYESPYSEMMWESPDGTKIFGILFANWYNNGNEVPTDKKIAKEYWDDRLKKVATFASTDEYLLMNGCDHQPVQADLGKAIEVASELYPDINFKHSNFPEYIKAIKEKVPNDLAVVKGELTSQDTDGWSTLMNCASSHIYLKQMNRKCESALENGAEPVRVLSSVLGQNYPSDELEYSWKKLMQNHPHDSICCCSVDEVQDEMATRFNKSKQVADY…
R. UCG13	GH38-B	XGD5_GH38_30	PCR of gDNA	GAAGGAGATATACATATGGAGCGAAAAAATATAAAATGTCATTTTATATCC	GTGATGGTGGTGATGATGTTCATATTTTAATGTATAAATTTGTTTTGGAGT	ERKNIKCHFISNTHWDREWKFSAQRTRHMLVTAIDMLLDIFEKEPDYKHFHLDSQTLPIQDYLEINPEKKEILKKYISEGKLAVGPWFCLPDEFCVGGESLIRNLLLGHKIANEFGKVSKTGYSPFGWGQISQMPQLYHGFGIDFASFYRGLNTYMAPKSEFYWEGADGTTIYASRLGQRPRYNMWYIMQRPVFYGKRDGDNRRVSWGAGDGIFRFADPARCEYEYQYSHRKYEYHDEYIAEKTEQALSEQDDEWTTPNRFWSNGHDSSIPDMRESRLIKDANAVYEGVDVFHSTVYDFEQSVIRDFDKNSPVLKGEMRYPFTKGSVSALFGWVLSARIKVKQENFETERLLTSYTEPMAVFASVCGAVYPQAFINKAYNYMLQNHGHDSIGACGRDVV…
R. UCG13	GH94	GH94 (XGD13_rxn6)	PCR of gDNA	GAAGGAGATATACATATGGGTTCTTCTAAATATGGATATTTTGACGATTTGAATAAG	GTGATGGTGGTGATGATGCATTACCACCTCTACATTGCATATTTC	GSSKYGYFDDLNKEYVIETPRTPLPWINYLGTNGFFSLISNTSGGYCFYKDAKHRRILRYRYNNIPADNGGRYFYINDNGDCWTPSYMPMKKELDFYECRHGMGYTKITGERNGVRVEQTAFVPVDDNCEIHRIKVTNTSGEAKNINLFSFVEFCLWNAQDDMLNYQRNLNTGEVEIDGSAIYHKTEYRERRNHYAFYSVNTEISGFDTDRDTFLGAFNGLDTPDRVINGKSGNSVASGWYPIASHQIDVSLDAGESREYIFVLGYIENEKDEKFESLNVINKTKAKEMIARYESSAQCDAELDKLKLYWDNLLSVFTLESNDEKLNRMVNIWNPYQCMVTFNMSRSASYYESGIGRGMGFRDSNQDLLGFVHQIPERARERIIDIASTQFEDGSAYHQ…
mouse R. UCG13	mouse RuGH5a (GH5 only) (A)	XGD110-2	PCR of gDNA	GAAGGAGATATACATATGGGTTCTGCGGCGGCAGCAGAAAATGCA	GTGATGGTGGTGATGATGTGACTTCATATGCAGATTCCATGCCGT	GSAAAAENAEINYNRSVPLEVKGNKIVKQGTDEMVVLRGVNVPSMDWGMAENLYESMTMVYDCWGANLIRLPIHPKYWKDGSIWDGKNLTKEQYQKYIDDMVKAAQARGKYIILDCHRYVMPQQDDLDMLKELAVKYGNNSAVLFGLLNEPHDIKPTDIEKPTMEDQWEVWYNGGQIIVGGEEVTAIGHQQLLNEIRALGANNICIAGGLSWAFDISGLADGYNGRENGYRLIDTAEGHGVMYDSHAYPVKGTKSSWDTIIGPVRRVAPILIGEWGWDSSDNNISGGDCTSDIWMNQIMNWMDDTDNQYDGIPLNWTAWNLHMKSHHHHHH
mouse R. UCG13	mouse RuGH5a (GH5 only) (B)	XGD110-3	PCR of gDNA	GAAGGAGATATACATATGGGTTCTGCAGAAATTAACTATAATCGTTCTGTGCCTC	GTGATGGTGGTGATGATGTGACTTCATATGCAGATTCCATGCCGT	GSAEINYNRSVPLEVKGNKIVKQGTDEMVVLRGVNVPSMDWGMAENLYESMTMVYDCWGANLIRLPIHPKYWKDGSIWDGKNLTKEQYQKYIDDMVKAAQARGKYIILDCHRYVMPQQDDLDMLKELAVKYGNNSAVLFGLLNEPHDIKPTDIEKPTMEDQWEVWYNGGQIIVGGEEVTAIGHQQLLNEIRALGANNICIAGGLSWAFDISGLADGYNGRENGYRLIDTAEGHGVMYDSHAYPVKGTKSSWDTIIGPVRRVAPILIGEWGWDSSDNNISGGDCTSDIWMNQIMNWMDDTDNQYDGIPLNWTAWNLHMKSHHHHHH
mouse R. UCG13	mouse RuGH5a (GH5 only) (C)	XGD110-7	PCR of gDNA	GAAGGAGATATACATATGGGTTCTGCAGAAATTAACTATAATCGTTCTGTGCCTC	GTGATGGTGGTGATGATGGCCATCCTGTGTCTCAGGCAAATTACC	GSAEINYNRSVPLEVKGNKIVKQGTDEMVVLRGVNVPSMDWGMAENLYESMTMVYDCWGANLIRLPIHPKYWKDGSIWDGKNLTKEQYQKYIDDMVKAAQARGKYIILDCHRYVMPQQDDLDMLKELAVKYGNNSAVLFGLLNEPHDIKPTDIEKPTMEDQWEVWYNGGQIIVGGEEVTAIGHQQLLNEIRALGANNICIAGGLSWAFDISGLADGYNGRENGYRLIDTAEGHGVMYDSHAYPVKGTKSSWDTIIGPVRRVAPILIGEWGWDSSDNNISGGDCTSDIWMNQIMNWMDDTDNQYDGIPLNWTAWNLHMKSSPRMISSWDYKTTAYNGTYIKNRLQSYGNLPETQDGHHHHHH
mouse R. UCG13	mouse RuGH5a (D)	XGD110-11	PCR of gDNA	GAAGGAGATATACATATGGGTTCTGCAGAAATTAACTATAATCGTTCTGTGCCTC	GTGATGGTGGTGATGATGTTCAGCCCATTCTATGTCCGCTAC	GSAEINYNRSVPLEVKGNKIVKQGTDEMVVLRGVNVPSMDWGMAENLYESMTMVYDCWGANLIRLPIHPKYWKDGSIWDGKNLTKEQYQKYIDDMVKAAQARGKYIILDCHRYVMPQQDDLDMLKELAVKYGNNSAVLFGLLNEPHDIKPTDIEKPTMEDQWEVWYNGGQIIVGGEEVTAIGHQQLLNEIRALGANNICIAGGLSWAFDISGLADGYNGRENGYRLIDTAEGHGVMYDSHAYPVKGTKSSWDTIIGPVRRVAPILIGEWGWDSSDNNISGGDCTSDIWMNQIMNWMDDTDNQYDGIPLNWTAWNLHMKSSPRMISSWDYKTTAYNGTYIKNRLQSYGNLPETQDGVYSTDFSTNDVFRGYKAPSGAASVSYSEANENIVVSHKPADWYA…
mouse R. UCG13	mouse RuGH5a (full) (E)	XGD110-19	PCR of gDNA	GAAGGAGATATACATATGGGTTCTGCAGAAATTAACTATAATCGTTCTGTGCCTC	GTGATGGTGGTGATGATGCGTTTCCACAGTGTATGTATCGTCACC	GSAEINYNRSVPLEVKGNKIVKQGTDEMVVLRGVNVPSMDWGMAENLYESMTMVYDCWGANLIRLPIHPKYWKDGSIWDGKNLTKEQYQKYIDDMVKAAQARGKYIILDCHRYVMPQQDDLDMLKELAVKYGNNSAVLFGLLNEPHDIKPTDIEKPTMEDQWEVWYNGGQIIVGGEEVTAIGHQQLLNEIRALGANNICIAGGLSWAFDISGLADGYNGRENGYRLIDTAEGHGVMYDSHAYPVKGTKSSWDTIIGPVRRVAPILIGEWGWDSSDNNISGGDCTSDIWMNQIMNWMDDTDNQYDGIPLNWTAWNLHMKSSPRMISSWDYKTTAYNGTYIKNRLQSYGNLPETQDGVYSTDFSTNDVFRGYKAPSGAASVSYSEANENIVVSHKPADWYA…
B. intestinalis	PL-CE	PL full	Synthesized DNA	N/A	N/A	HHHHHHSSGLVPRGSHMASGHSMHPLNQISYVKKKIKEQQEPYFTAYRQLMHYADSIQEVSQNALVDFAVPGFYDKPEEHRANSLALQRDAFAAYCSALAYQLSGEERYGQKACYFLNAWSSTNKKYSEHDGVLVMSYSGSALLMAAELMMDTPIWNPQDKDAFKTWVSQVYQKAVNEIRVHKNNWADWGRFGSLLAASLLDDKEEVARNVQLIKSDLFVKIAEDGHMPEEVVRGNNGIWYTYFSLAPMTAACWLVYNLTGENLFVWEHNDASLKKALDYMFYFHQHPSEWKWDTRPNLGAHETWPDNLLEAMAGIYNDASYLQYVESSRPHIYPLHHFAWSFPTLMPVSLKGYDLTDNNTWANYNRYEVANKTVKKPVAIFMGNSITEGWNRSHPDFF…
B. intestinalis	PL (PL only)	PL (PL domain only)	Synthesized DNA	N/A	N/A	HHHHHHSSGLVPRGSHMASGHSMHPLNQISYVKKKIKEQQEPYFTAYRQLMHYADSIQEVSQNALVDFAVPGFYDKPEEHRANSLALQRDAFAAYCSALAYQLSGEERYGQKACYFLNAWSSTNKKYSEHDGVLVMSYSGSALLMAAELMMDTPIWNPQDKDAFKTWVSQVYQKAVNEIRVHKNNWADWGRFGSLLAASLLDDKEEVARNVQLIKSDLFVKIAEDGHMPEEVVRGNNGIWYTYFSLAPMTAACWLVYNLTGENLFVWEHNDASLKKALDYMFYFHQHPSEWKWDTRPNLGT
B. intestinalis	GH88	GH88	Synthesized DNA	N/A	N/A	HHHHHHSSGLVPRGSHMASCAPDKQADTIHLDRQLEYCDAQIRRTLSEADQDSCLMPRSMEANQTNWNMSNIYDWTSGFWPGILWYDYEATGDEEIKAQAIRYTECLLPLVTPAHGADHDIGFQIFCSFGNAYRITGNEEYKTVILKGAQKLAKLYNPKVGTILSWPGMVKRMGWPHNTIMDNMMNLEILFWAARNGGGQELYDIAVKHAQTTMKYSFREDGGNYHVAVYDTIDGHFIKGVTNQGYGDSSLWARGQAWAIYGYMMVYRETQDKTFLRFAEKVTELYLENLPEDYIPYWDFDAPDMIKQPKDASAAAITASALIELSELEDTPSLASRYLNAATRMLGELSSERYQCRDIKPAFLMHSTGNQPGGYEIDASINYADYYYLQALLKYKKAM…
B. intestinalis	GH92	GH92	Synthesized DNA	N/A	N/A	HHHHHHSSGLVPRGSHMASDKVDMWMGTYGAGHCVVGPQLPHGSVNPSPQTAYGGHAGYVPDQPIRGFGQLHVSGIGWGRYGQIFLSPQVGFNPGETDHDSPKQGEEATPYYYKVMLSRYDIQVEISPTHHCVAYRFTFPETDQGNILLDIAHNIPQHIVPEVKGLFHGGEINYNPEQQTLTGWGEYSGGFGSTDAYKVYFAMKTDTPLKEVKITDQGDKALYACLALNKNPGVVHLNVGISLKSIENASLFLSEEIADNSFNTVKENAKAIWDNTLSSIKIKSENEAEERLFYTTLYHSFVMPRDRTGDNPHWDSESAHMDDHYCVWDTWRTKYPLMVLLRESYVAQTINSFIDRFAHNGVCNPTFTSSLDWTSKQGGDDVDNIIADAIVKNVKGFDY…
B. intestinalis	GH3	GH3	Synthesized DNA	N/A	N/A	HHHHHHSSGLVPRGSHMASQQIKPAIPSDPEIEAKINKLLQKLTLEEKIGQMCEITIDVITDFSDKENGFRLSESMLDTVIGKYKVGSILNTPFSIAQEKEVWADLITRIQKKSMEEIGIPCIYGVDQIHGTTYTRGGTFFPQSINMAAAFNRQLTRRGAEISAYETKACCIPWNYAPVMDLGRDPRWPRMWESYGEDCYVNAEMGVQAVKGLQGENPNHIGENNVAACIKHFMGYGVPVSGKDRTPSSISRTDLREKHFAPFLASIQAGALSLMVNSGVDNGVPFHANKELLTGWLKEELNWDGMIVTDWADINNLCLRDHIAETKKEAIQIAINAGIDMSMVPYEVSFCTYLKELVEEGKVSMARIDDAVSRVLRLKYRLGLFDNPYWDIRKYDQFA…
B. intestinalis	GH5	GH5	Synthesized DNA	N/A	N/A	HHHHHHSSGLVPRGSHMASDTKSSLPFGVNLAGAEFFHKKMDGVGQFGIDYHYPTTREFDYWKSKGLTLIRLPFKWERIQRELYGELNREEIDYIKYLLDEAGARDMKILIDMHNYGRRKDNGKDRIIGDSVSIDHFASVWKQIAGELKEHSALYGYGLINEPHDMLDSVPWFKIAQAAIEESRKVDLKTAIVVGGNHWSSAARWQEISDDLKHLHDPSDNLIFEGHCYFDEDGSGIYRRSYDEEKAYPTIGIDRTRPFVEWLKTNNLRGFIGEYGVPGDDERWLVCLDNFLDYLSKENINGTYWAAGAQWNKYILSIHPDDNYQTDKIQLGVLTKYLETKN
